# Supplementary material for: Breast Milk Lipidome Is Associated with Early Growth Trajectory in Preterm Infants
Source: Preprints.org preprint supplement (doi:10.20944/preprints201712.0068.v1), 2017-12-11
Supplement: Supplementary file 1 [file supplementary]

Archive with 5 entries (5 files):
- Online supporting material_alexandre_Nutrients.docx
- supplemental figure S1-alexandre_Nutrients.pdf
- supplemental figure S2-alexandre_Nutrients.pdf
- Supplemental_Table 1_alexandre_Nutrients.pdf
- Supplemental_Table 2_alexandre_Nutrients.pdf
