# Supplementary material for: Breast Milk Lipidome Is Associated with Early Growth Trajectory in Preterm Infants
Source: Preprints.org preprint supplement (doi:10.20944/preprints201712.0068.v1), 2017-12-11
Supplement: Supplementary file 1 [file supplementary › Supplemental_Table 1_alexandre_Nutrients.pdf]

**Table S1.** Concentration levels of total fatty acids (free and triglycerides- and phospholipids-bound) expressed as % of total identified FA, measured in human preterm milk at W2, W3, W4 of lactation and provided to newborns with fast or slow growth.

| Fatty acids (%)                  | Week 2                |                               | Week 3                |                                  | Week 4                |                                  | Week 2 through eek 4  |                                   |
|----------------------------------|-----------------------|-------------------------------|-----------------------|----------------------------------|-----------------------|----------------------------------|-----------------------|-----------------------------------|
|                                  | Slow growth<br>(n=11) | Fast growth<br>(n= 8)         | Slow growth<br>(n=14) | Fast growth<br>(n=10)            | Slow growth<br>(n=11) | Fast growth<br>(n=11)            | Slow growth<br>(n=38) | Fast growth<br>(n=29)             |
| 8:0                              | 0.179 [0.159-0.222]   | 0.205 [0.171-0.246]           | 0.165 [0.147-0.224]   | 0.209 [0.178-0.260]              | 0.197 [0.129-0.208]   | 0.184 [0.138-0.214]              | 0.176 [0.151-0.211]   | 0.198 [0.157-0.236]               |
| 10:0                             | 1.726 [1.528-1.880]   | 1.730 [1.549-2.278]           | 1.633 [1.403-2.045]   | 1.849 [1.741-2.112]              | 1.643 [1.542-1.926]   | 1.713 [1.582-1.919]              | 1.654 [1.512-1.911]   | 1.791 [1.591-2.082]               |
| 12:0                             | 6.636 [5.906-7.037]   | 7.651 [6.009-8.868]           | 6.391 [5.059-7.092]   | 7.181 [6.404-7.991]              | 6.077 [5.821-6.870]   | 6.832 [5.474-7.923]              | 6.203 [5.817-6.866]   | 7.100 [6.069-8.127] <sup>a</sup>  |
| 14:0                             | 7.050 [6.936-8.053]   | 8.181 [6.816-9.890]           | 6.999 [5.797-8.129]   | 8.073 [7.160-9.573] <sup>a</sup> | 6.966 [5.617-8.021]   | 8.039 [5.617-9.939]              | 7.049 [6.053-8.045]   | 8.039 [6.909-9.629] <sup>a</sup>  |
| 16:0                             | 22.76 [20.95-25.79]   | 21.41 [20.04-24.37]           | 23.19 [18.69-24.44]   | 24.04 [21.44-25.57]              | 23.49 [18.00-24.11]   | 23.02 [20.81-24.11]              | 23.19 [19.48-24.84]   | 23.15 [21.21-24.84]               |
| 18:0                             | 6.709 [6.154-7.346]   | 6.216 [5.893-6.787]           | 7.076 [6.241-7.418]   | 7.114 [5.881-7.685]              | 6.809 [6.439-8.099]   | 7.049 [5.594-7.823]              | 6.872 [6.313-7.556]   | 6.934 [5.883-7.435]               |
| 20:0                             | 0.195 [0.190-0.203]   | 0.192 [0.184-0.207]           | 0.195 [0.165-0.220]   | 0.198 [0.191-0.231]              | 0.204 [0.157-0.214]   | 0.195 [0.168-0.204]              | 0.195 [0.170-0.211]   | 0.196 [0.178-0.211]               |
| SAT                              | 46.06 [42.64-49.30]   | 48.32 [44.01-49.44]           | 45.74 [38.73-46.91]   | 48.08 [46.32-52.67] <sup>a</sup> | 45.27 [39.07-48.13]   | 47.81 [39.71-49.57]              | 45.74 [41.97-48.51]   | 48.08 [45.81-49.54] <sup>a</sup>  |
| MCSAT                            | 8.445 [7.609-8.816]   | 9.527 [7.730-11.390]          | 8.116 [6.715-9.235]   | 9.480 [8.377-10.200]             | 7.817 [7.246-9.011]   | 8.844 [7.212-9.916]              | 8.050 [7.506-8.871]   | 8.976 [7.772-10.210] <sup>a</sup> |
| 16:1 <sub>n-9</sub>              | 0.476 [0.436-0.530]   | 0.456 [0.401-0.520]           | 0.476 [0.406-0.498]   | 0.468 [0.378-0.495]              | 0.499 [0.413-0.561]   | 0.425 [0.392-0.522]              | 0.479 [0.419-0.530]   | 0.4573 [0.393-0.514]              |
| 16:1 <sub>n-7</sub>              | 2.335 [2.027-2.745]   | 2.220 [2.063-2.671]           | 2.269 [2.003-2.644]   | 2.314 [1.990-3.096]              | 2.332 [1.956-2.796]   | 2.447 [2.178-2.662]              | 2.331 [2.030-2.737]   | 2.239 [2.098-2.698]               |
| 18:1 <sub>n-9</sub>              | 33.56 [32.24-35.79]   | 33.45 [29.86-35.71]           | 35.67 [32.06-39.70]   | 32.07 [30.50-34.69] <sup>a</sup> | 35.80 [32.27-37.88]   | 33.20 [32.27-35.80]              | 34.79 [32.25-37.88]   | 32.82 [31.02-34.78] <sup>a</sup>  |
| 18:1 <sub>n-7</sub>              | 1.673 [1.446-2.003]   | 1.666 [1.429-2.335]           | 1.686 [1.568-1.960]   | 1.719 [1.571-2.004]              | 1.919 [1.640-1.994]   | 1.898 [1.655-1.994]              | 1.720 [1.495-1.993]   | 1.818 [1.556-2.007]               |
| 20:1 <sub>n-9</sub>              | 0.561 [0.527-0.603]   | 0.566 [0.471-0.698]           | 0.542 [0.503-0.594]   | 0.534 [0.446-0.620]              | 0.481 [0.464-0.521]   | 0.514 [0.463-0.533]              | 0.532 [0.483-0.567]   | 0.520 [0.462-0.597]               |
| MUFA                             | 39.58 [37.59-42.75]   | 39.44 [35.24-41.06]           | 41.79 [37.47-44.83]   | 39.12 [36.48-40.80] <sup>a</sup> | 41.35 [38.07-42.70]   | 39.58 [38.07-42.56]              | 41.10 [37.77-44.35]   | 39.58 [36.87-40.82] <sup>a</sup>  |
| MUFA/SFA                         | 0.87 [0.78-0.97]      | 0.81 [0.71-0.98] <sup>a</sup> | 0.90 [0.78-1.17]      | 0.82 [0.70-0.87]                 | 0.93 [0.82-1.09]      | 0.83 [0.77-0.96] <sup>a</sup>    | 0.91 [0.79-1.04]      | 0.82 [0.74-0.91] <sup>a</sup>     |
| 18:1 <sub>n-9</sub> et n-7       | 35.12 [34.27-38.13]   | 35.30 [31.62-37.18]           | 37.48 [33.70-41.08]   | 33.88 [32.17-36.37] <sup>a</sup> | 37.59 [34.04-39.57]   | 35.25 [34.25-38.36]              | 36.67 [34.09-39.79]   | 34.78 [32.76-36.61] <sup>a</sup>  |
| cis 18:2 <sub>n-6</sub> (LA)     | 9.545 [8.856-12.62]   | 8.958 [7.922-11.84]           | 9.695 [8.587-12.37]   | 8.960 [7.322-11.61]              | 10.54 [8.469-13.14]   | 8.787 [8.468-12.22]              | 9.651 [8.754-12.41]   | 8.881 [7.859-11.64]               |
| cis 18:3 <sub>n-6</sub> (GLNA)   | 0.100 [0.082-0.109]   | 0.098 [0.066-0.114]           | 0.115 [0.083-0.137]   | 0.096 [0.084-0.134]              | 0.118 [0.091-0.133]   | 0.100 [0.080-0.129]              | 0.107 [0.086-0.133]   | 0.099 [0.078-0.125]               |
| cis 20:2 <sub>n-6</sub>          | 0.323 [0.279-0.371]   | 0.347 [0.297-0.402]           | 0.294 [0.251-0.317]   | 0.279 [0.223-0.348]              | 0.263 [0.251-0.302]   | 0.268 [0.238-0.316]              | 0.295 [0.252-0.332]   | 0.295 [0.235-0.343]               |
| cis 20:3 <sub>n-6</sub>          | 0.373 [0.322-0.471]   | 0.425 [0.349-0.515]           | 0.344 [0.299-0.412]   | 0.409 [0.330-0.453]              | 0.361 [0.315-0.435]   | 0.352 [0.277-0.435]              | 0.349 [0.317-0.443]   | 0.404 [0.317-0.456]               |
| cis 20:4 <sub>n-6</sub> (AA)     | 0.506 [0.499-0.632]   | 0.502 [0.448-0.698]           | 0.484 [0.412-0.587]   | 0.479 [0.421-0.574]              | 0.467 [0.383-0.569]   | 0.381 [0.365-0.590]              | 0.502 [0.425-0.580]   | 0.467 [0.379-0.591]               |
| cis 22:2 <sub>n-6</sub>          | 0.056 [0.047-0.070]   | 0.064 [0.057-0.075]           | 0.048 [0.038-0.053]   | 0.045 [0.041-0.055]              | 0.041 [0.037-0.049]   | 0.039 [0.034-0.053]              | 0.048 [0.040-0.061]   | 0.048 [0.039-0.060]               |
| cis 22:4 <sub>n-6</sub>          | 0.128 [0.118-0.164]   | 0.139 [0.107-0.159]           | 0.107 [0.092-0.125]   | 0.112 [0.097-0.129]              | 0.100 [0.081-0.125]   | 0.086 [0.080-0.110]              | 0.113 [0.091-0.135]   | 0.108 [0.086-0.134]               |
| Total n-6 PUFA                   | 10.94 [10.37-14.35]   | 10.72 [9.60-13.47]            | 11.39 [9.83-13.27]    | 10.30 [8.83-13.27]               | 12.02 [10.12-14.82]   | 10.18 [9.83-14.10]               | 11.44 [10.20-14.14]   | 10.38 [9.434-13.32]               |
| cis 18:3 <sub>n-3</sub> (ALNA)   | 0.796 [0.597-0.968]   | 0.969 [0.745-1.249]           | 0.852 [0.585-1.181]   | 0.893 [0.537-1.197]              | 0.835 [0.694-1.248]   | 1.011 [0.741-1.506]              | 0.831 [0.609-1.140]   | 0.947 [0.720-1.285]               |
| cis 20:5 <sub>n-3</sub> (EPA)    | 0.063 [0.028-0.075]   | 0.075 [0.061-0.123]           | 0.059 [0.041-0.086]   | 0.071 [0.057-0.085]              | 0.052 [0.043-0.069]   | 0.083 [0.069-0.095] <sup>a</sup> | 0.058 [0.042-0.077]   | 0.076 [0.061-0.092] <sup>b</sup>  |
| cis 22:5 <sub>n-3</sub> (DPA)    | 0.155 [0.120-0.161]   | 0.171 [0.136-0.212]           | 0.135 [0.112-0.187]   | 0.160 [0.139-0.177]              | 0.140 [0.097-0.172]   | 0.164 [0.140-0.1736]             | 0.141 [0.114-0.172]   | 0.164 [0.140-0.180] <sup>a</sup>  |
| cis 22:6 <sub>n-3</sub> (DHA)    | 0.367 [0.235-0.429]   | 0.397 [0.343-0.572]           | 0.325 [0.221-0.417]   | 0.385 [0.286-0.465]              | 0.317 [0.211-0.341]   | 0.371 [0.328-0.452] <sup>a</sup> | 0.320 [0.220-0.390]   | 0.383 [0.316-0.477] <sup>a</sup>  |
| Total n-3 PUFA                   | 1.562 [1.393-1.894]   | 1.965 [1.847-2.144]           | 1.701 [1.336-2.149]   | 1.712 [1.262-2.236]              | 1.565 [1.479-1.836]   | 1.875 [1.674-2.449] <sup>i</sup> | 1.598 [1.411-1.976]   | 1.881 [1.466-2.213] <sup>a</sup>  |
| Total PUFA                       | 12.83 [11.93-16.41]   | 12.65 [11.48-15.50]           | 13.15 [11.50-16.67]   | 11.81 [10.27-15.41]              | 13.50 [11.51-16.65]   | 12.09 [11.51-16.55]              | 12.96 [11.74-16.40]   | 12.29 [11.15-15.65]               |
| Unsaturated/saturated fatty acid | 1.17 [1.03-1.34]      | 1.07 [1.02-1.27]              | 1.18 [1.13-1.58]      | 1.08 [0.90-1.16]                 | 1.21 [1.08-1.55]      | 1.09 [1.02-1.52] <sup>a</sup>    | 1.18 [1.06-1.38]      | 1.08 [1.02-1.18] <sup>a</sup>     |
| PUFA/SFA                         | 0.29 [0.26-0.33]      | 0.26 [0.24-0.32]              | 0.29 [0.23-0.39]      | 0.25 [0.19-0.33]                 | 0.30 [0.24-0.43]      | 0.25 [0.22-0.42]                 | 0.29 [0.24-0.38]      | 0.26 [0.22-0.32]                  |
| n-6/n-3 PUFA                     | 7.10 [6.32-7.81]      | 5.81 [5.03-7.05]              | 6.22 [5.59-8.35]      | 6.29 [4.79-7.00]                 | 7.66 [5.42-8.29]      | 5.56 [5.27-5.76] <sup>i</sup>    | 7.03 [5.83-8.23]      | 5.71 [5.04-6.87] <sup>b</sup>     |
| LC-PUFA                          | 2.194 [1.969-2.544]   | 2.511 [1.980-2.983]           | 2.052 [1.685-2.388]   | 2.196 [1.999-2.333]              | 1.951 [1.624-2.174]   | 2.046 [1.871-2.284]              | 2.088 [1.768-2.321]   | 2.129 [1.978-2.383]               |
| Essential FA (LA+ALNA)           | 10.73 [9.42-13.83]    | 9.85 [8.87-13.02]             | 10.73 [9.39-13.83]    | 9.38 [8.24-13.02]                | 11.37 [8.96-14.44]    | 9.85 [8.96-13.73]                | 10.73 [9.46-13.81]    | 9.83 [8.79-13.18]                 |
| LA/ALA                           | 10.86 [10.08-16.22]   | 10.49 [9.05-11.64]            | 11.45 [8.08-16.95]    | 10.30 [8.17-13.14]               | 10.81 [9.23-13.72]    | 8.99 [8.07-11.09] <sup>i</sup>   | 10.86 [9.30-15.66]    | 9.99 [8.35-11.69] <sup>a</sup>    |
| AA/DHA                           | 1.657 [1.220-2.491]   | 1.320 [1.013-1.633]           | 1.661 [1.144-2.134]   | 1.465 [1.048-1.737]              | 1.778 [1.426-2.235]   | 1.197 [0.804-1.689] <sup>a</sup> | 1.679 [1.251-2.191]   | 1.307 [0.983-1.690] <sup>b</sup>  |
| BCFA                             | 30.87 [29.20-32.53]   | 30.75 [28.42-33.09]           | 29.21 [27.09-31.34]   | 32.25 [30.14-34.36]              | 29.55 [26.85-32.26]   | 30.70 [28.03-33.37] <sup>i</sup> | 29.82 [28.65-30.99]   | 31.25 [29.99-32.51]               |

PUFA: Polyunsaturated fatty acid; AA: arachidonic acid; EPA: eicosapentaenoic acid; DHA: docosahexanoic acid; DGLA : dihomogamma-linolenic acid ; GLNA : gamma-linolenic acid ; LA: Linoleic acid; ALNA: alpha-Linolenic acid. SAT: saturated fatty acids; MCSAT: medium chain saturated fatty acids (C8:0 to C12:0); MUFA: monounsaturated fatty acid; LC-PUFA: Long-Chain PUFA (polyunsaturated fatty acid that contains at least 20 carbons); BCFA: branched-chain fatty acids (C14:0, C15:0; C17:0 and C16:0).

Values (expressed as % of total identified FA) are median and [25% and 75% percentile] and are given for fatty acids present at > 0.05% of total fatty acids in milk. Values of p-values (assessed by Mann Whitney *U* test) between fast and slow growth groups were reported with <sup>a</sup> or <sup>b</sup> significantly different at same stage of lactation, p<0.05 or p<0.01, respectively and *t*, a trend, 0.050<p<0.10. n: milk samplings at week 2, week 3 and week 4 of lactation. Fatty acids in bold and red font presented a corrected p-value <0.05, using the *post hoc* control of the type I error rate (False discovery Rate procedure), between the two infant groups on the total W2 to W4 lactation period.
