# Supplementary material for: Breast Milk Lipidome Is Associated with Early Growth Trajectory in Preterm Infants
Source: Preprints.org preprint supplement (doi:10.20944/preprints201712.0068.v1), 2017-12-11
Supplement: Supplementary file 1 [file supplementary › Supplemental_Table 2_alexandre_Nutrients.pdf]

**Table S2.** Abundance ( $10^6$ ) of annotated discriminant lipids measured in breast milk at week 2 (W2), W3, W4 of lactation provided to preterm infants with fast or slow growth.

| Lipids                                                                       | mz                                                                                                                  | Week 2                |                                  | Week 3                |                                  | Week 4                |                                  | Week 2 through eek 4  |                                  |
|------------------------------------------------------------------------------|---------------------------------------------------------------------------------------------------------------------|-----------------------|----------------------------------|-----------------------|----------------------------------|-----------------------|----------------------------------|-----------------------|----------------------------------|
|                                                                              |                                                                                                                     | Slow growth<br>(n=11) | Fast growth<br>(n= 8)            | Slow growth<br>(n=14) | Fast growth<br>(n=10)            | Slow growth<br>(n=13) | Fast growth<br>(n= 11)           | Slow growth<br>(n=38) | Fast growth<br>(n=29)            |
| <b>Fatty acid</b>                                                            |                                                                                                                     | 9.16 [8.56-10.86]     | 7.20 [2.35-12.50]                | 8.96 [6.88-15.82]     | 8.25 [5.85-10.81]                | 10.44 [6.49-13.25]    | 10.54 [5.27-17.66]               | 9.47 [7.40-12.84]     | 8.39 [5.53-13.00]                |
| Anandamide (C18:3,<br>n-6)                                                   | 339,2889 [M+NH <sub>4</sub> ] <sup>+</sup>                                                                          | 8.32 [7.67-10.68]     | 6.48 [2.21-11.92]                | 8.45 [6.07-14.75]     | 7.37 [5.62-9.62]                 | 9.89 [6.10-12.49]     | 9.61 [4.71-15.74]                | 8.80 [7.02-11.77]     | 7.43 [5.11-11.47]                |
| C16:0                                                                        | 353,2679<br>[M+Na] <sup>+</sup>                                                                                     | 0.68 [0.41-1.17]      | 0.49 [0.26-0.92]                 | 0.51 [0.35-1.06]      | 0.68 [0.26-1.68]                 | 0.60 [0.45-0.88]      | 0.89 [0.63-2.53] <sup>a</sup>    | 0.64 [0.39-10.27]     | 0.76 [0.35-1.47]                 |
| <b>3-Hydroxyadipic<br/>acid</b>                                              | 161.0455[M-H] <sup>-</sup>                                                                                          | 17.68 [10.61-19.20]   | 12.16 [2.82-13.60] <sup>b</sup>  | 17.45 [14.15-23.01]   | 8.95 [1.53-18.25] <sup>a</sup>   | 15.66 [15.01-24.79]   | 11.85 [8.57-15.69] <sup>a</sup>  | 17.17 [14.02-20.25]   | 11.85 [5.68-15.09] <sup>c</sup>  |
| <b>N-formylmaleamic<br/>acid</b>                                             | 142.0203[M-H] <sup>-</sup>                                                                                          | 1.01 [0.73-1.37]      | 0.66 [0.55-0.98]                 | 1.39 [0.85-1.66]      | 0.81 [0.58-0.99] <sup>a</sup>    | 1.36 [0.89-1.72]      | 0.77 [0.58-1.03] <sup>b</sup>    | 1.26 [0.84-1.64]      | 0.73 [0.59-0.97] <sup>c</sup>    |
| <b>Dodecatetraenedioi<br/>c acid</b>                                         | 221.0667 [M-H] <sup>-</sup>                                                                                         | 0.72 [0.49-0.79]      | 0.55 [0.38-0.60] <sup>f</sup>    | 0.82 [0.59-1.13]      | 0.59 [0.29-0.83] <sup>f</sup>    | 0.77 [0.64-1.14]      | 0.77 [0.64-1.14] <sup>f</sup>    | 0.77 [0.53-0.88]      | 0.55 [0.34-0.73] <sup>b</sup>    |
| <i>Linderic acid</i>                                                         | 187.1340 [M-H] <sup>-</sup>                                                                                         | 0.58 [0.37-1.55]      | 0.73[0.27-2.54]                  | 0.50 [0.34-1.58]      | 0.69 [0.45-1.59]                 | 0.49 [0.38-0.84]      | 0.82 [0.43-2.37]                 | 0.52 [0.38-1.43]      | 0.76 [0.42-1.80]                 |
| <i>alpha-hydroxy lauric<br/>acid</i>                                         | 215.1653 [M-H] <sup>-</sup>                                                                                         | 3.81 [2.12-9.11]      | 4.53 [2.67-11.64]                | 4.49 [2.14-11.64]     | 4.53 [2.69-11.64]                | 3.70 [2.47-6.64]      | 5.19 [2.37-14.68]                | 4.06 [2.39-8.23]      | 5.08 [2.51-13.03]                |
| 2-hydroxy palmitic<br>acid                                                   | 271.2281 [M-H] <sup>-</sup>                                                                                         | 40.03 [22.51-46.34]   | 35.99 [27.78-50.95]              | 40.70 [24.53-67.66]   | 36.62 [31.35-78.37]              | 35.67 [22.19-47.58]   | 37.44 [30.01-48.14]              | 38.63 [22.48-48.63]   | 37.44 [29.98-50.32]              |
| <b>3-oxo-4-pentenoic<br/>acid</b>                                            | 113.0243 [M-H] <sup>-</sup>                                                                                         | 1.48 [0.90-1.57]      | 0.98 [0.71-1.09]                 | 1.42 [1.19-1.89]      | 1.08 [0.54-1.43] <sup>t</sup>    | 1.43 [1.27-1.95]      | 0.94 [0.73-1.24] <sup>b</sup>    | 1.43 [1.18-1.71]      | 0.94 [0.69-1.28] <sup>c</sup>    |
| <b>Dehydrocholic acid</b>                                                    | 401.2312 [M-H] <sup>-</sup>                                                                                         | 0.38 [0.27-0.68]      | 0.48 [0.30-1.16]                 | 0.51 [0.19-0.85]      | 0.73 [0.28-0.97]                 | 0.36 [0.16-0.59]      | 0.52 [0.38-1.03]                 | 0.43 [0.21-0.73]      | 0.52 [0.33-0.97]                 |
| <i>7R,9,14R-trimethyl-<br/>2E,4E,8E,10E-<br/>hexadecatetraenoic<br/>acid</i> | 289.2169 [M-H] <sup>-</sup>                                                                                         | 0.27 [0.11-0.71]      | 0.21 [0.12-0.55]                 | 0.26 [0.09-0.45]      | 0.28 [0.13-0.36]                 | 0.18 [0.08-0.32]      | 0.42 [0.15-1.41] <sup>a</sup>    | 0.19 [0.10-0.48]      | 0.27 [0.14-0.46]                 |
| <b>Ceramides</b>                                                             |                                                                                                                     | 15.15 [12.83-18.17]   | 21.03 [16.42-23.55] <sup>f</sup> | 15.65 [12.95-20.65]   | 19.41 [17.36-24.15] <sup>a</sup> | 16.51 [13.07-19.16]   | 21.76 [18.29-25.19] <sup>a</sup> | 15.56 [12.98-18.63]   | 20.27 [17.34-23.79] <sup>c</sup> |
| <b>Cer(18:1/22:0)</b>                                                        | <b>622,6123 [M+H]<sup>+</sup></b><br>604,6017 [M+H-H <sub>2</sub> O]<br><sup>+</sup> ; 644,5491 [M+Na] <sup>+</sup> | 1.01 [0.89-1.28]      | 1.22 [1.09-1.63]                 | 0.99 [0.88-1.34]      | 1.41 [1.21-1.70] <sup>t</sup>    | 1.36 [0.88-1.47]      | 1.40 [1.18-1.75]                 | 1.03 [0.89-1.38]      | 1.36 [1.14-1.69] <sup>b</sup>    |
| <b>Cer(d18:1/24:0)</b>                                                       | <b>632,6326 [M-H<sub>2</sub>O]<sup>+</sup></b><br>650,643[M+H] <sup>+</sup>                                         | 14.20 [11.80-17.15]   | 19.81 [15.40-21.58] <sup>a</sup> | 14.60 [12.07-19.65]   | 18.16 [16.10-22.41] <sup>a</sup> | 15.14 [12.21-17.69]   | 20.01 [16.92-23.89] <sup>a</sup> | 14.59 [12.11-17.50]   | 18.78 [16.21-22.15] <sup>c</sup> |
| <b>GlucosylCeramide</b>                                                      |                                                                                                                     | 498.9 [442.3-610.2]   | 529.3 [475.1-560.2]              | 499.5 [486.8-571.8]   | 527.8 [503.3-570.5]              | 533.7 [508.4-588.3]   | 496.9 [471.5-533.6] <sup>f</sup> | 511.4 [487.8-574.5]   | 519.5 [483.9-558.1]              |

|                                      |                                                 |                     |                                 |                     |                                  |                     |                                  |                     |                                   |
|--------------------------------------|-------------------------------------------------|---------------------|---------------------------------|---------------------|----------------------------------|---------------------|----------------------------------|---------------------|-----------------------------------|
| Glucosylceramide (d18:2/14:0)        | 685,5361 [M+NH <sub>4</sub> ] <sup>+</sup>      | 19.82 [6.76-45.39]  | 25.05 [12.08-41.90]             | 31.87 [12.44-40.50] | 29.16 [16.29-52.04]              | 38.66 [27.61-53.57] | 23.71 [11.75-30.08] <sup>a</sup> | 32.05 [13.43-46.52] | 26.70 [13.73-41.90]               |
| Galactosylceramide (d18:1/18:1)      | 743,614 [M+NH <sub>4</sub> ] <sup>+</sup>       | 322.4 [288.5-388.6] | 341.6 [312.8-355.5]             | 315.3 [306.0-349.5] | 342.0 [321.1-350.1]              | 330.6 [315.0-356.1] | 3260 [305.8-348.9]               | 322.7 [309.6-355.8] | 340.8 [316.5-348.9]               |
| Galactosylceramide (d18:1/20:0)      | 773,652 [M+NH <sub>4</sub> ] <sup>+</sup>       | 32.72 [30216-35.24] | 31.47 [29.73-34.96]             | 29.98 [28.97-33.85] | 33.20 [30.58-33.99]              | 32.17 [30.15-34.23] | 31.11 [28.03-33.13]              | 31.36 [29.58-33.78] | 31.52 [30.08-33.87]               |
| GlcCer(d18:1/16:0)                   | 717,5892[M+NH <sub>4</sub> ] <sup>+</sup>       | 39.18 [32.19-48.53] | 46.30 [33.69-49.24]             | 42.93 [35.61-48.98] | 43.89 [39.17-48.53]              | 42.43 [38.55-48.47] | 37.92 [34.60-44.25]              | 42.06 [34.50-48.39] | 42.43 [35.90-48.07]               |
| <b>GlcCer (d18:1/18:0)</b>           | 728.5481 [M+H] <sup>+</sup>                     | 2.65 [1.58-2.98]    | 1.20 [1.04-1.90] <sup>a</sup>   | 2.25 [1.27-2.80]    | 1.66 [1.16-1.92]                 | 2.28 [1.63-2.72]    | 2.20 [1.78-2.47]                 | 2.28 [1.54-2.87]    | 1.85 [1.18-2.24] <sup>b</sup>     |
| Glucosylceramide (d18:1/20:0)        | 773,6614 [M+NH <sub>4</sub> ] <sup>+</sup>      | 21.74 [18.44-23.29] | 18.17 [15.20-24.95]             | 19.99 [18.14-21.04] | 18.90 [16.05-20.64]              | 20.92 [19.53-22.04] | 19.70 [16.75-24.53]              | 20.89 [19.20-22.66] | 19.24 [15.94-22.67]               |
| <i>Glucosylceramide (d18:1/24:0)</i> | 854,7266 [M+Na] <sup>+</sup>                    | 57.75 [53.51-65.40] | 60.55 [56.26-64.81]             | 57.81 [54.84-63.46] | 63.24 [60.37-70.26] <sup>f</sup> | 59.04 [54.82-62.41] | 62.37 [53.80-66.93]              | 57.94 [54.82-62.99] | 62.46 [56.55-66.47] <sup>f</sup>  |
|                                      |                                                 |                     |                                 |                     |                                  |                     |                                  |                     |                                   |
| <b>PC</b>                            |                                                 | 393.0 [323.8-523.3] | 461.9 [379.1-614.5]             | 377.1 [338.9-426.7] | 453.3 [383.3-555.6]              | 329.2 [290.0-478.9] | 449.3 [348.1-661.2] <sup>a</sup> | 357.0 [315.6-456.2] | 453.3 [370.1-568.0] <sup>b</sup>  |
| <i>PC(18:0/18:1)</i>                 | 788,5863 [M+H] <sup>+</sup>                     | 2.06 [1.35-2.86]    | 3.84 [3.20-4.65] <sup>b</sup>   | 2.96 [1.19-5.82]    | 4.47 [3.07-5.46]                 | 3.75 [2.14-5.66]    | 3.64 [2.80-5.89]                 | 2.59 [1.55-4.34]    | 4.16 [3.06-5.25] <sup>a</sup>     |
| PC(14:0/16:0)                        | 706,5391 [M+H] <sup>+</sup>                     | 2.52 [1.28-5.68]    | 1.76 [1.44-5.51]                | 1.67 [1.37-2.17]    | 1.80 [1.62-2.32]                 | 1.10 [0.96-1.86]    | 2.41 [1.382-4.15] <sup>a</sup>   | 1.54 [1.09-2.63]    | 1.830 [1.47-3.3] <sup>f</sup>     |
| PC(14:0/16:1)                        | 704,5237 [M+H] <sup>+</sup>                     | 0.34 [0.13-0.59]    | 0.36 [0.17-0.51]                | 0.24 [0.09-0.33]    | 0.24 [0.17-0.38]                 | 0.17 [0.09-0.25]    | 0.26 [0.10-0.79]                 | 0.20 [0.09-0.40]    | 0.25 [0.13-0.50]                  |
| <b>PC (20:0/20:2)</b>                | 842,636 [M+H] <sup>+</sup>                      | 1.76 [1.44-2.65]    | 2.88 [1.93-4.21]                | 1.49 [1.11-2.30]    | 2.41 [1.68-3.12] <sup>f</sup>    | 1.26 [1.06-2.10]    | 1.95 [1.23-3.02]                 | 1.49 [1.11-2.33]    | 2.33 [178-3.33] <sup>b</sup>      |
| PC (16:1/18:1)                       | 1620,1146 [M+HPO <sub>3</sub> +2H] <sup>+</sup> | 1.11 [0.87-1.33]    | 1.04 [0.88-1.10]                | 1.04 [0.89-1.16]    | 1.08 [0.96-1.17]                 | 1.08 [0.90-1.27]    | 0.93 [0.77-1.12]                 | 1.06 [0.89-1.21]    | 1.03 [0.89-1.14]                  |
| PC(16:1/18:0)                        | 1542,1426 [2M+Na] <sup>+</sup>                  | 13.34 [8.45-14.65]  | 10.95 [10.43-12.45]             | 11.59 [9.34-13.33]  | 11.25 [9.81-12.16]               | 10.02 [6.29-12.85]  | 9.60 [8.18-11.01]                | 11.759 [8.45-13.37] | 10.58 [9.23-11.88]                |
|                                      | 1512,1349 [2M+H] <sup>+</sup>                   |                     |                                 |                     |                                  |                     |                                  |                     |                                   |
| <i>PC(16:1/18:2)</i>                 |                                                 | 2.38 [1.74-3.32]    | 3.43 [1.95-3.68]                | 2.38 [1.98-2.99]    | 3.39 [1.87-3.91]                 | 2.21 [1.64-2.72]    | 2.26 [1.69-3.57]                 | 2.33 [1.70-2.96]    | 3.23 [1.762-3.79] <sup>f</sup>    |
|                                      | 1576,2229 [2M+H] <sup>+</sup>                   |                     |                                 |                     |                                  |                     |                                  |                     |                                   |
| PC(18:0/18:1)                        |                                                 | 15.27 [6.44-30.47]  | 16.68 [6.17-20.95]              | 13.59 [7.79-24.17]  | 13.76 [7.38-32.15]               | 7.83 [4.56-16.82]   | 15.61 [8.11-70.28] <sup>f</sup>  | 12.09 [7.30-23.45]  | 16.68 [8.09-28.81]                |
| <i>PC(18:1/18:1)</i>                 | 1572,1908[2M+H] <sup>+</sup>                    | 104.6 [78.09-160.9] | 130.4 [111.5-176.1]             | 103.7 [90.18-137.1] | 126.7 [86.02-158.9]              | 94.63 [81.57-118.7] | 124.4 [97.86-184.3] <sup>f</sup> | 103.2 [84.86-131.5] | 127.6 [99.45-164.00] <sup>a</sup> |
| <b>PC(18:0/18:2)</b>                 | 786,5899 [M+H] <sup>+</sup>                     | 7.14 [6.50-11.42]   | 11.67 [8.34-27.59] <sup>f</sup> | 7.00 [5.94-9.09]    | 10.68 [8.89-13.22] <sup>a</sup>  | 6.00 [5.28-9.09]    | 9.82 [7.09-13.12] <sup>f</sup>   | 7.02 [5.92-9.61]    | 10.60 [8.13-13.21] <sup>c</sup>   |
| <b>PC(16:0/20:3)</b>                 | 784,5833 [M+H] <sup>+</sup>                     | 56.16 [44.20-69.90] | 77.29 [61.62-103.20]            | 56.41 [42.88-65.07] | 69.42 [59.73-84.51] <sup>a</sup> | 43.42 [40.94-63.31] | 56.82 [44.20-77.38]              | 51.58 [41.81-65.60] | 65.96 [52.12-85.89] <sup>b</sup>  |
| PC(18:0/20:1)                        | 816,6456 [M+H] <sup>+</sup>                     | 12.52 [8.16-19.72]  | 11.55 [6.59-24.14]              | 13.64 [9.66-18.97]  | 13.55 [8.42-19.84]               | 7.16 [5.81-17.89]   | 13.21 [9.41-24.84] <sup>a</sup>  | 11.92 [7.23-18.88]  | 12.22 [8.59-20.67]                |
| <b>PC(18 :0/20 :3)</b>               | 812,6143 [M+H] <sup>+</sup>                     | 30.28 [21.05-55.08] | 50.23 [40.70-71.27]             | 33.97 [27.33-41.64] | 47.83 [43.47-55.78] <sup>b</sup> | 26.02 [23.18-44.92] | 45.77 [31.32-5395] <sup>a</sup>  | 30.80 [25.22-44.50] | 46.59 [37.16-55.24] <sup>c</sup>  |
| PC (18 :0/20 :5)                     | 808,5806 [M+H] <sup>+</sup>                     | 87.25 [73.41-102.6] | 80.89 [68.57-97.91]             | 95.20 [83.45-110.0] | 95.30 [78.67-115.20]             | 88.18 [74.87-116.3] | 108.1 [84.60-127.8]              | 93.34 [74.64-112.8] | 94.55 [78.87-119.9]               |

|                        |                               |                      |                                 |                      |                                  |                               |                                  |                     |                                  |
|------------------------|-------------------------------|----------------------|---------------------------------|----------------------|----------------------------------|-------------------------------|----------------------------------|---------------------|----------------------------------|
| <b>PC(20:1/20:4)</b>   | 836,6145 [M+H] <sup>+</sup>   | 3.61 [3.05-6.59]     | 5.45 [4.25-7.58]                | 3.90 [3.27-4.33]     | 4.66 [3.45-5.26]                 | 3.25 [2.55-4.50]              | 4.91 [2.93-6.59] <sup>a</sup>    | 3.72 [2.96-4.54]    | 4.88 [3.77-6.26] <sup>a</sup>    |
| PC(18:0/22:6)          | 834,596 [M+H] <sup>+</sup>    | 15.17 [8.69-19.00]   | 13.43 [8.09-17.20]              | 10.59 [8.45-14.18]   | 11.52 [9.79-18.00]               | 10.19 [8.34-13.47]            | 12.60 [10.08-26.61]              | 11.95 [8.65-15.21]  | 12.61 [10.11-17.45]              |
| <b>PC(20:3/22:6)</b>   | 856,5807 [M+H] <sup>+</sup>   | 5.39 [4.20-7.57]     | 6.49 [4.94-9.81]                | 5.78 [4.61-7.13]     | 6.45 [6.10-7.28]                 | 4.74 [3.27-5.72]              | 6.12 [3.93-9.71] <sup>f</sup>    | 5.418 [3.95-6.97]   | 6.46 [5.06-7.62] <sup>a</sup>    |
| <b>PC(16:0/22:6)</b>   | 806,5678 [M+H] <sup>+</sup>   | 13.96 [12.04-21.19]  | 21.06 [15.53-37.69]             | 11.64 [9.48-16.10]   | 16.09 [12.84-22.20] <sup>f</sup> | 8.14 [5.31-13.28]             | 14.73 [8.77-24.17] <sup>a</sup>  | 12.08 [7.25-16.08]  | 16.07 [12.04-24.40] <sup>a</sup> |
| <b>PC-plasmalogen</b>  |                               | 9.02 [7.23-11.38]    | 8.69 [6.71-9.87]                | 8.89 [6.92-11.19]    | 8.47 [6.89-12.82]                | 6.52 [5.61-9.70]              | 9.74 [7.25-14.43] <sup>t</sup>   | 8.16 [6.53-10.52]   | 8.88 [6.97-12.23]                |
| <b>PC(P-18:0/18:0)</b> | 796,6199 [M+Na] <sup>+</sup>  | 1.81 [1.18-3.17]     | 2.59 [2.02-3.09]                | 1.84 [1.69-2.18]     | 2.26 [1.82-3.98] <sup>i</sup>    | 1.26 [1.03-2.20]              | 2.07 [1.22-3.05]                 | 1.72 [1.19-2.49]    | 2.32 [1.85-3.09] <sup>b</sup>    |
| PC (P-16:0/18:2)       | 742,5723 [M+H] <sup>+</sup>   | 2.81 [1.76-3.47]     | 1.28 [0.99-3.03]                | 2.29 [1.48-2.89]     | 1.45 [1.18-2.34]                 | 1.70 [1.50-2.56]              | 1.92 [1.33-2.88]                 | 2.18 [1.61-2.98]    | 1.59 [1.09-2.52] <sup>f</sup>    |
| PC(O-16:0/18:1)        | 768,5514 [M+H] <sup>+</sup>   | 4.26 [2.97-5.48]     | 3.96 [2.94-6.15]                | 4.21 [3.66-6.09]     | 4.82 [3.34-7.06]                 | 3.81 [3.17-5.02]              | 5.62 [3.82-8.68]                 | 4.11 [3.36-5.58]    | 4.82 [3.42-6.81]                 |
| PE                     |                               | 279.9 [232.1-317.5]  | 307.1 [277.6-370.8]             | 277.7 [252..8-310.9] | 317.0 [266.5-354.8] <sup>f</sup> | 280.1 [254.6-334.3]           | 341.5 [298.1-356.0] <sup>a</sup> | 279.4 [253.2-317.5] | 316.5 [283.1-356.3] <sup>b</sup> |
| <b>PE(16:0/16:1)</b>   | 690,5054 [M+H] <sup>+</sup>   | 1.92 [1.62-2.26]     | 2.12 [1.91-2.74]                | 1.88 [1.58-2.31]     | 2.14 [1.81-2.54]                 | 1.63 [1.51-1.95]              | 2.21 [1.94-2.32] <sup>a</sup>    | 1.79 [1.59-2.22]    | 2.15 [1.93-2.45] <sup>b</sup>    |
| <i>PE(16:1/20:0)</i>   | 1492,1294 [2M+H] <sup>+</sup> | 6.83 [6.59-9.26]     | 8.84 [6.66-14.18]               | 7.21 [5.44-9.04]     | 8.38 [5.42-9.95]                 | 6.19 [4.64-8.81]              | 8.58 [6.92-11.59] <sup>a</sup>   | 6.72 [5.45-8.88]    | 8.38 [6.85-10.43] <sup>a</sup>   |
| <i>PE(16:0/20:2)</i>   | 1488,0975 [2M+H] <sup>+</sup> | 18.36 [16.48-27.41]  | 25.99 [14.77-32.73]             | 20.91 [19.82-27.79]  | 23.59 [17.24-32.51]              | 24.34 [18.70-27.94]           | 29.23 [26.18-36.13] <sup>a</sup> | 21.16 [18.3-27.46]  | 27.62 [18.61-34.14] <sup>a</sup> |
| <b>PE(16:0/20:2)</b>   | 744,5519 [M+H] <sup>+</sup>   | 138.0 [133.05-153.1] | 149.4 [125.2-177.9]             | 141.2 [126.5-170.3]  | 165.4 [149.7-173.6]              | 150.0 [140.1-172.1]           | 176.2 [163.5-198.5] <sup>a</sup> | 142.2 [132.7-168.4] | 166.6 [151.1-179.3] <sup>a</sup> |
| <i>PE(16:0/20:4)</i>   | 779,5379 [M+Na] <sup>+</sup>  | 0.65 [0.56-0.83]     | 0.94 [0.69-1.73] <sup>f</sup>   | 0.78 [0.52-0.91]     | 0.87 [0.69-1.12]                 | 0.65 [0.57-0.91]              | 0.71 [0.57-0.96]                 | 0.67 [0.57-0.87]    | 0.81 [0.61-1.19] <sup>a</sup>    |
| PE(18:0/20:0)          | 776,60 [M+H] <sup>+</sup>     | 2.19 [1.42-2.55]     | 1.54 [1.27-1.74]                | 1.58 [1.27-2.43]     | 1.54 [1.18-1.89]                 | 1.62 [1.24-1.88]              | 1.52 [1.23-1.71]                 | 1.68 [1.29-2.50]    | 1.52 [1.25-1.73] <sup>f</sup>    |
| <i>PE(20:1/20:4)</i>   | 794,5676 [M+H] <sup>+</sup>   | 8.00 [6.58-13.18]    | 9.89 [8.66-12.36]               | 7.43 [6.02-9.99]     | 9.50 [7.90-10.35]                | 6.21 [6.03-9.61]              | 8.75 [7.52-10.07]                | 7.45 [6.07-10.05]   | 9.41 [8.22-10.29] <sup>a</sup>   |
| <b>PE(18:0/20:4)</b>   | 1536,0968 [2M+H] <sup>+</sup> | 5.11 [3.45-7.71]     | 9.09 [5.62-9.94]                | 5.25 [4.00-7.33]     | 8.02 [6.57-10.05]                | 3.62 [3.26-7.62] <sup>a</sup> | 6.24 [4.38-7.67]                 | 4.93 [3.62-7.23]    | 7.71 [5.28-9.57] <sup>b</sup>    |
| <b>PE(22:0/20:3)</b>   | 826,6047 [M+H] <sup>+</sup>   | 2.13 [1.53-2.33]     | 2.991 [2.02-3.48] <sup>f</sup>  | 2.30 [1.77-2.63]     | 2.67 [2.09-4.16]                 | 1.99 [1.44-2.46]              | 2.45 [2.24-2.66] <sup>a</sup>    | 2.09 [1.53-2.61]    | 2.51 [2.18-3.48] <sup>b</sup>    |
| PE(18:1/18:2)          | 1484,067 [2M+H] <sup>+</sup>  | 2.17 [1.79-3.12]     | 2.22 [1.59-4.09]                | 3.05 [1.97-4.94]     | 2.99 [1.99-4.09]                 | 2.87 [2.27-3.99]              | 3.69 [3.07-4.94]                 | 2.79 [1.97-3.99]    | 3.14 [2.07-4.36]                 |
| PE(16:0/20:4)          | 740,5208 [M+H] <sup>+</sup>   | 5.61 [4.84-9.54]     | 5.51 [4.04-8.64]                | 9.13 [7.26-10.81]    | 6.19 [5.31-10.04]                | 7.84 [6.34-9.05]              | 8.79 [6.66-10.69]                | 7.75 [5.31-9.68]    | 7.18 [5.44-9.98]                 |
| <b>PE(18:2/18:2)</b>   | 740,5213 [M+H] <sup>+</sup>   | 5.67 [3.65-6.22]     | 6.66 [4.98-8.59]                | 4.74 [3.73-5.36]     | 6.68 [5.23-7.76] <sup>a</sup>    | 4.04 [3.43-5.18]              | 5.35 [3.93-6.59]                 | 4.76 [3.58-5.70]    | 6.21 [4.92-7.41] <sup>b</sup>    |
| <b>PE(20:0/18:1)</b>   | 774,599 [M+H] <sup>+</sup>    | 8.82 [6.49-9.60]     | 11.28 [9.03-11.81] <sup>f</sup> | 6.83 [5.73-8.44]     | 9.24 [8.29-14.44] <sup>a</sup>   | 5.86 [4.72-8.11]              | 7.61 [4.96-11.17]                | 6.92 [5.61-9.12]    | 9.24 [7.24-11.69] <sup>b</sup>   |
| PE(18:0/20:4)          | 768,5495 [M+H] <sup>+</sup>   | 13.47 [12.28-14.23]  | 14.52 [12.90-16.31]             | 13.53 [13.12-14.58]  | 13.86 [12.58-16.45]              | 13.51 [12.51-14.84]           | 14.26 [13.36-15.96]              | 13.52 [12.42-14.25] | 14.14 [13.13-15.75] <sup>f</sup> |
| <b>PE(20:4/20:0)</b>   | 796,5836 [M+H] <sup>+</sup>   | 8.55 [5.93-9.10]     | 10.45 [8.02-12.82]              | 5.66 [5.16-8.83]     | 8.63 [7.89-9.14]                 | 5.33 [4.49-6.89]              | 6.87 [5.41-9.51] <sup>a</sup>    | 6.13 [4.98-8.72]    | 8.63 [6.81-10.52] <sup>b</sup>   |
| PE(22:6/18:0)          | 792,5517 [M+H] <sup>+</sup>   | 20.94 [16.36-26.54]  | 22.88 [21.36-29.70]             | 16.66 [12.80-22.70]  | 18.96 [14.89-21.86]              | 16.28 [9.65-18.76]            | 18.06 [13.80-29.99]              | 17.55 [12.31-22.26] | 20.02 [15.51-25.01]              |
| <b>PE(20:3/22:6)</b>   | 814,5336 [M+H] <sup>+</sup>   | 3.03 [2.29-3.20]     | 3.44 [3.24-4.09] <sup>a</sup>   | 2.38 [2.08-3.05]     | 3.04 [2.59-3.59] <sup>f</sup>    | 2.10 [1.73-2.75]              | 2.82 [2.36-3.55] <sup>a</sup>    | 2.63 [1.96-3.06]    | 3.14 [2.58-3.59] <sup>c</sup>    |

|                                          |                                             |                     |                                  |                     |                                  |                     |                                  |                     |                                  |
|------------------------------------------|---------------------------------------------|---------------------|----------------------------------|---------------------|----------------------------------|---------------------|----------------------------------|---------------------|----------------------------------|
| PE(22:0/22:6)                            | 848,6566 [M+H] <sup>+</sup>                 | 5.79 [4.27-6.85]    | 4.49 [2.89-6.06]                 | 4.62 [3.91-6.12]    | 4.26 [3.46-6.10]                 | 3.84 [3.20-5.44]    | 3.62 [2.50-4.47]                 | 4.69 [3.55-6.02]    | 4.25 [2.64-4.98]                 |
| <b>PE(18:0/20:3)</b>                     | 770,5672 [M+H] <sup>+</sup>                 | 11.34 [9.87-17.03]  | 17.13 [14.44-24.18] <sup>a</sup> | 13.22 [10.00-16.82] | 17.41 [16.14-21.77] <sup>b</sup> | 13.12 [11.05-14.76] | 16.52 [13.17-20.76] <sup>a</sup> | 12.72 [10.13-16.13] | 17.21 [14.84-20.82] <sup>c</sup> |
| <b>PE-plasmalogen</b>                    |                                             | 44.13 [36.63-64.48] | 40.47 [38.82-64.03]              | 36.91 [33.51-45.87] | 36.88 [33.25-49.31]              | 34.91 [28.61-48.45] | 45.43 [29.30-50.00]              | 39.91 [31.47-49.92] | 38.83 [34.83-52.40]              |
| PE(P-16:0/20:5)                          | 722,5102 [M+H] <sup>+</sup>                 | 4.96 [4.00-8.39]    | 6.01 [4.55-8.69]                 | 4.97 [4.16-8.44]    | 5.41 [4.07-6.42]                 | 4.46 [3.66-5.40]    | 5.66 [4.60-9.13] <sup>a</sup>    | 4.73 [3.96-7.45]    | 5.92 [4.46-7.69]                 |
| PE(P-16:0/18:0)                          | 726,5323 [M+Na] <sup>+</sup>                | 13.32 [7.75-14.76]  | 7.97 [5.92-14.24]                | 10.53 [8.68-11.84]  | 7.36 [5.59-11.04] <sup>f</sup>   | 9.33 [6.24-14.73]   | 10.62 [6.34-15.49]               | 10.82 [7.93-14.26]  | 9.44 [5.92-13.33]                |
| PE(P-16:0/20:0)                          | 754,5636 [M+Na] <sup>+</sup>                | 4.45 [2.44-6.67]    | 4.08 [2.01-5.01]                 | 4.13 [3.20-5.17]    | 3.71 [2.07-5.18]                 | 4.08 [2.19-5.26]    | 3.94 [2.44-4.74]                 | 4.11 [2.58-5.23]    | 3.94 [2.25-4.96]                 |
| PE(P-16:0/20:3)                          | 726,5417 [M+H] <sup>+</sup>                 | 11.88 [8.45-14.43]  | 12.29 [9.03-14.30]               | 10.72 [9.39-11.38]  | 11.29 [9.09-13.93]               | 9.84 [8.12-11.63]   | 10.69 [9.44-14.91]               | 10.49 [8.45-12.70]  | 11.39 [9.41-14.01]               |
| <b>PE(O-18:0/20:5)</b>                   | 752,5551 [M+H] <sup>+</sup>                 | 9.08 [7.40-9.99]    | 13.09 [9.10-17.54] <sup>f</sup>  | 7.39 [5.14-10.08]   | 10.18 [7.70-11.97] <sup>a</sup>  | 7.83 [5.51-9.26]    | 7.94 [6.72-10.43]                | 7.84 [6.04-9.98]    | 9.95 [7.30-12.09] <sup>a</sup>   |
| PG                                       |                                             | 15.75 [15.06-16.04] | 17.55 [15.16-24.07]              | 16.88 [15.94-18.45] | 18.57 [17.31-20.61] <sup>f</sup> | 16.91 [16.14-19.41] | 20.12 [17.63-23.07] <sup>a</sup> | 16.41 [15.59-18.36] | 18.85 [16.90-22.25] <sup>b</sup> |
| PG(16:0/16:0)                            | 723,5101 [M+H] <sup>+</sup>                 | 2.89 [2.55-3.51]    | 3.62 [2.47-3.70]                 | 3.40 [2.98-4.22]    | 3.26 [2.76-4.33]                 | 3.56 [2.85-4.06]    | 3.57 [3.16-3.78]                 | 3.31 [2.77-3.90]    | 3.57 [2.85-3.79]                 |
| PG(18:0/20:4)                            | 799,5425 [M+H] <sup>+</sup>                 | 2.07 [1.60-2.58]    | 1.63 [1.43-2.19]                 | 2.07 [1.71-2.37]    | 1.96 [1.44-2.19]                 | 2.18 [1.72-2.36]    | 2.18 [1.72-2.36]                 | 2.11 [1.72-2.36]    | 1.90 [1.48-2.25]                 |
| <b>PG(P-16:0/22:4)</b>                   | 783,5586 [M+H] <sup>+</sup>                 | 1.59 [1.38-1.93]    | 1.73 [1.20-2.57]                 | 1.59 [1.30-1.79]    | 2.02 [1.47-2.24] <sup>f</sup>    | 1.33 [1.16-1.69]    | 1.83 [1.43-2.22] <sup>a</sup>    | 1.58 [1.26-1.76]    | 1.93 [1.47-2.26] <sup>a</sup>    |
| <b>PG(18:2/20:5)</b>                     | 810,523 [M+NH <sub>4</sub> ] <sup>+</sup>   | 5.64 [4.43-7.28]    | 7.24 [5.70-9.58] <sup>a</sup>    | 6.51 [5.80-6.96]    | 7.22 [6.63-8.52] <sup>a</sup>    | 6.94 [6.39-7.61]    | 8.91 [6.79-11.58] <sup>a</sup>   | 6.52 [5.64-7.40]    | 7.67 [6.61-9.94] <sup>b</sup>    |
| <b>PG(22:2/22:6)</b>                     | 892,5991 [M +NH <sub>4</sub> ] <sup>+</sup> | 3.06 [2.91-3.61]    | 3.51 [2.46-3.89]                 | 3.37 [3.07-3.37]    | 3.57 [3.15-4.16]                 | 3.09 [2.91-3.76]    | 3.69 [3.07-3.77] <sup>f</sup>    | 3.20 [2.97-3.61]    | 3.56 [3.12-3.91] <sup>a</sup>    |
| <b>PI</b>                                |                                             |                     |                                  |                     |                                  |                     |                                  |                     |                                  |
| <b>PI (36:0)</b><br><b>PI(18:0/18:0)</b> | 889,5716 [M+Na] <sup>+</sup>                | 0.86 [0.60-1.03]    | 1.42 [0.78-2.21]                 | 1.24 [0.84-1.49]    | 1.56 [1.20-2.14]                 | 0.91 [0.64-1.22]    | 0.95 [0.50-2.43]                 | 0.92 [0.78-1.39]    | 1.26 [0.89-2.20] <sup>a</sup>    |
| <b>PS</b>                                |                                             |                     |                                  |                     |                                  |                     |                                  |                     |                                  |
| <b>PS(40:5)</b>                          | 838,552 [M+H] <sup>+</sup>                  | 2.81 [2.30-3.23]    | 3.03 [2.59-3.33]                 | 2.76 [2.48-3.09]    | 2.92 [2.63-3.05]                 | 2.71 [2.54-2.89]    | 2.89 [2.59-3.12]                 | 2.72 [2.52-3.06]    | 2.95 [2.64-3.11]                 |
| <b>PS(18:0/20:4)</b>                     | 812,5419 [M+H] <sup>+</sup>                 | 2.36 [1.58-2.78]    | 2.65 [2.36-3.05]                 | 2.17 [1.75-2.61]    | 3.02 [2.57-3.37] <sup>b</sup>    | 2.02 [1.54-3.08]    | 2.41 [1.90-3.58]                 | 2.13 [1.59-2.77]    | 2.79 [2.29-3.26] <sup>b</sup>    |
| <b>Retinol</b>                           | 287.2362 [M+H] <sup>+</sup>                 | 2.94 [1.95-4.01]    | 1.26 [0.99-2.43]                 | 1.76 [1.09-2.69]    | 1.35 [1.08-3.43]                 | 1.60 [1.20-2.49]    | 2.02 [1.39-5.17]                 | 2.02 [1.33-2.97]    | 1.57 [1.10-3.11]                 |

|                           |                                                                         |                                       |                                      |                                      |                                                   |                                      |                                      |                                      |                                                                |
|---------------------------|-------------------------------------------------------------------------|---------------------------------------|--------------------------------------|--------------------------------------|---------------------------------------------------|--------------------------------------|--------------------------------------|--------------------------------------|----------------------------------------------------------------|
| <b>Diacylglycerides</b>   |                                                                         | 132.2 [83.46-193.4]                   | 76.87 [34.60-101.1]                  | 102.3 [58.31-163.8]                  | 55.71 [42.87-106.8]                               | 97.34 [66.98-105.5]                  | 109.4 [94.81-190.1]                  | 104.0 [66.98-163.6]                  | 92.39 [52.86-126.5]                                            |
| <i>DG (14:0/18:3)</i>     | 580,5373 [M+Na] <sup>+</sup>                                            | 10.52 [3.93-18.79]                    | 3.73 [1.14-8.58] <sup>a</sup>        | 9.68 [3.23-15.54]                    | 3.16 [2.21-8.11]                                  | 6.12 [3.09-13.52]                    | 8.06 [4.76-9.38]                     | 8.52 [3.30-15.47]                    | 4.92 [2.30-9.16] <sup>a</sup>                                  |
| DG (16:0/16:1)            | 567,4974[M+H] <sup>+</sup><br>584,5241[M+NH <sub>4</sub> ] <sup>+</sup> | 6.81 [5.58-10.46]                     | 4.19 [2.12-6.23]                     | 6.06 [3.62-11.28]                    | 4.19 [2.76-11.57]                                 | 4.79 [3.76-7.61]                     | 6.99 [4.95-25.78]                    | 6.61 [3.88-7.99]                     | 5.26 [3.05-11.07]                                              |
| DG 18:0/18:1)             | 645,544<br>[M+Na] <sup>+</sup>                                          | 7.72 [5.72-11.20]                     | 5.80 [4.37-8.88]                     | 6.99 [4.55-9.24]                     | 6.41 [5.07-11.60]                                 | 7.34 [4.67-10.74]                    | 8.29 [6.77-14.90]                    | 7.56 [5.03-7.58]                     | 6.90 [5.51-11.53]                                              |
| <i>DG(18:0/18:2)</i>      | 638,5708<br>[M+NH <sub>4</sub> ] <sup>+</sup>                           | 77.81 [37.88-111.2]                   | 41.46 [18.19-55.76]                  | 51.31 [36.04-87.52]                  | 27.50 [20.11-43.92] <sup>a</sup>                  | 49.20 [34.51-72.11]                  | 54.28 [36.67-94.98]                  | 55.02 [36.04-87.52]                  | 40.60 [22.83-66.09] <sup>t</sup>                               |
| DG (18:0/18:1)            | 634,5395<br>[M+NH <sub>4</sub> ] <sup>+</sup>                           | 11.50 [5.61-17.94]                    | 7.92 [6.28-15.59]                    | 11.76 [4.54-22.49]                   | 9.30 [7.46-13.05]                                 | 9.40 [5.47-13.47]                    | 16.70 [9.99-33.27] <sup>a</sup>      | 10.80 [5.53-17.81]                   | 10.46 [7.75-17.81]                                             |
| DG(20:4/19:0)             | 681,5402<br>[M+Na] <sup>+</sup>                                         | 1.62 [0.53-2.17]                      | 0.80 [0.40-2.25]                     | 0.76 [0.40-1.23]                     | 1.33 [0.58-1.79]                                  | 0.79 [0.55-1.16]                     | 1.11 [0.82-2.72]                     | 0.92 [0.47-1.60]                     | 1.07 [0.60-2.03]                                               |
| <i>DG (20:3-/20:0)</i>    | 675,5901[M+H] <sup>+</sup><br><b>697,5727</b> [M+Na] <sup>+</sup>       | 1.10 [0.56-1.40]<br>7.15 [3.91-12.79] | 1.10 [0.56-1.40]<br>2.53 [1.05-6.22] | 0.67 [0.37-1.31]<br>4.64 [2.25-9.02] | 0.30 [0.39-0.80] <sup>t</sup><br>2.11 [1.45-7.85] | 0.50 [0.22-0.95]<br>3.46 [2.61-6.05] | 0.54 [0.47-1.18]<br>3.47 [2.58-4.01] | 0.77 [0.38-1.35]<br>4.98 [2.91-9.25] | 0.48 [0.18-1.12] <sup>t</sup><br>2.74 [1.64-4.81] <sup>a</sup> |
| DG (18:3/20:0)            | 647,5574 [M+H] <sup>+</sup>                                             | 9.35 [4.24-17.80]                     | 2.88 [0.91-8.02]                     | 5.41 [2.31-14.49]                    | 2.19 [1.48-9.29]                                  | 5.05 [2.33-9.56]                     | 5.52 [2.54-10.20]                    | 6.81 [2.59-13.46]                    | 4.06 [1.51-9.17] <sup>t</sup>                                  |
| <i>DG(20:4/22:5)</i>      | 713,5103 [M+Na] <sup>+</sup>                                            | 0.67 [0.33-1.03]                      | 0.17 [0.09-0.46] <sup>a</sup>        | 0.48 [0.23-0.65]                     | 0.22 [0.12-0.35] <sup>t</sup>                     | 0.72 [0.19-0.85]                     | 0.53 [0.18-1.03]                     | 0.56 [0.24-0.79]                     | 0.26 [0.15-0.56] <sup>a</sup>                                  |
| <b>Triglycerides</b>      |                                                                         | 7867 [6912-8639]                      | 7478 [7175-8784]                     | 7784 [7495-8151]                     | 7550 [7230-8292]                                  | 7649 [7271-7798]                     | 7581 [7333-9707]                     | 7758 [7304-8118]                     | 7572[7236-8496]                                                |
| <b>TG(14:0/16:1/17:2)</b> | 804.7056 [M+NH <sub>4</sub> ] <sup>+</sup>                              | 56.51 [39.97-62.17]                   | 64.86 [46.81-73.28]                  | 53.64 [44.47-59.79]                  | 58.78 [53.58-74.04]                               | 55.90 [47.57-58.86]                  | 57.68 [53.58-67.82]                  | 55.94 [47.00-60.12]                  | 59.35 [52.54-69.66] <sup>a</sup>                               |
| TG(14:0/14:1/14:1)        | 741.5983 [M+Na] <sup>+</sup>                                            | 364.4 [356.5-561.7]                   | 404.0 [354.9-540.9]                  | 421.8 [365.4-524.5]                  | 430.7 [388.1- 467.0]                              | 412.2 [383.3-483.5]                  | 399.4 [350.4-444.8]                  | 415.0 [358.3-520.8]                  | 415.2 [371.5-448.9]                                            |
| <b>TG(14:0/16:0/16:0)</b> | 796,7277 [M+NH <sub>4</sub> ] <sup>+</sup>                              | 346.3 [293.1-380.8]                   | 358.04 [299.5-460.5]                 | 327.1 [291.0-389.8]                  | 384.4 [361.4-450.0] <sup>a</sup>                  | 336.1 [309.2-372.1]                  | 384.3 [355.6-438.8] <sup>a</sup>     | 337.3 [308.2-373.3]                  | 381.5 [340.2-439.9] <sup>b</sup>                               |
| TG(14:1/14:1/18:1)        | 790,6895 [M+NH <sub>4</sub> ] <sup>+</sup>                              | 1056 [890.1-1201]                     | 1071 [809.1-1372]                    | 1083 [1028-1305]                     | 1128 [978.0-1-1257]                               | 1108 [869.1-1317]                    | 970.9 [853.6-1390]                   | 1074 [923.6-1296]                    | 1074 [911.2-1330]                                              |
| <b>TG(14:0/14:1/19:1)</b> | 806.712 [M+NH <sub>4</sub> ] <sup>+</sup>                               | 9.07 [6.09-10.25]                     | 10.13 [7.62-12.47]                   | 9.08 [7.60-10.36]                    | 9.81 [8.69-11.36]                                 | 9.43 [7.66-9.62]                     | 9.82 [9.04-10.53] <sup>t</sup>       | 9.17 [7.68-10.01]                    | 9.81 [8.58-10.81] <sup>a</sup>                                 |
| TG(13:0/14:1/20:5)        | 798.6639 [M+NH <sub>4</sub> ] <sup>+</sup>                              | 120.9 [115.0-128.7]                   | 120.7 [110.9-123.2]                  | 114.2 [109.3-118.2]                  | 120.9 [116.7-126.7] <sup>t</sup>                  | 118.7 [115.8-124.3]                  | 115.2 [110.9-120.0]                  | 117.1 [114.0-124.0]                  | 118.9 [111.6-124.5]                                            |
| <b>TG(16:0/16:1/16:1)</b> | 820.7365 [M+NH <sub>4</sub> ] <sup>+</sup>                              | 1965 [1769-2160]                      | 2034 [1829-2436]                     | 2079 [1859-2154]                     | 2147 [1862-2472]                                  | 2037 [1814-2089]                     | 2239 [1978-2541] <sup>t</sup>        | 2033 [1831-2139]                     | 21425 [1937-2447] <sup>a</sup>                                 |
| <b>TG(14:0/16:0/16:0)</b> | 801.6948 [M+Na] <sup>+</sup>                                            | 26.31 [20.16-28.91]                   | 30.22 [23.99-33.55]                  | 26.14 [23.09-28.68]                  | 27.97 [24.45-38.50]                               | 25.86 [21.22-28.61]                  | 29.01 [23.74-41.66] <sup>t</sup>     | 25.93 [21.63-28.64]                  | 29.18 [24.40-36.14] <sup>b</sup>                               |
| TG(16:1/16:1/16:1)        | 823.676 [M+Na] <sup>+</sup>                                             | 260.1 [230.8-270.4]                   | 267.0 [240.7-278.8]                  | 256.8 [244.1-273.0]                  | 253.5 [246.2-271.1]                               | 259.8 [248.1-283.4]                  | 256.7 [240.8-270.1]                  | 257.9 [246.2-272.9]                  | 258.8 [244.0-270.8]                                            |
| TG(16:1/16:1/17:1)        | 832.7368 [M+NH <sub>4</sub> ] <sup>+</sup>                              | 80.25 [66.24-87.59]                   | 70.91 [61.09-86.23]                  | 74.32 [61.41-81.08]                  | 78.33 [72.73-94.73]                               | 75.09 [67.70-84.50]                  | 80.65 [67.91-91.05]                  | 74.98 [64.31-82.97]                  | 76.59 [69.19-90.90]                                            |
| TG(14:0/15:0/20:5)        | 828.7134 [M+NH <sub>4</sub> ] <sup>+</sup>                              | 10.30 [7.25-12.40]                    | 11.85 [9.85-12.60]                   | 10.42 [8.79-11.40]                   | 10.50 [8.76-12.33]                                | 10.56 [9.56-11.38]                   | 12.13 [9.91-13.49]                   | 10.48 [8.74-11.70]                   | 11.27 [9.79-12.47]                                             |
| TG(16:0/16:1/18:0)        | 850.7742 [M+NH <sub>4</sub> ] <sup>+</sup>                              | 326.9 [296.0-350.3]                   | 318.3 [268.0-351.3]                  | 320.2 [308.1-331.6]                  | 334.9 [311.1-369.6] <sup>a</sup>                  | 319.2 [307.4-329.4]                  | 323.5 [307.7-373.3]                  | 320.2 [306.7-334.3]                  | 325.7 [308.6-364.5]                                            |

|                           |                                            |                     |                                  |                     |                                  |                     |                                  |                      |                                   |
|---------------------------|--------------------------------------------|---------------------|----------------------------------|---------------------|----------------------------------|---------------------|----------------------------------|----------------------|-----------------------------------|
| <i>TG(16:0/17:1/18:1)</i> | 862.8205 [M+NH <sub>4</sub> ] <sup>+</sup> | 4.11 [2.89-5.71]    | 2.90 [1.32-4.86]                 | 2.96 [2.10-5.20]    | 2.84 [2.01-3.11]                 | 3.33 [2.58-5.25]    | 3.01 [2.54-4.13]                 | 3.37 [2.70-5.18]     | 2.93 [2.00-3.59] <sup>f</sup>     |
| <i>TG(16:0/16:0/18:1)</i> | 850.7655 [M+NH <sub>4</sub> ] <sup>+</sup> | 12.61 [10.10-14.34] | 10.28 [8.96-11.75] <sup>f</sup>  | 12.01 [11.44-13.16] | 11.09 [10.07-12.27]              | 11.96 [9.60-12.77]  | 11.37 [9.85-12.55]               | 12.01 [10.70-13.14]  | 11.06 [9.80-12.04] <sup>a</sup>   |
| TG(16:1/16:1/17:2)        | 830.7291 [M+NH <sub>4</sub> ] <sup>+</sup> | 10.42 [9.73-11.57]  | 10.36 [8.83-11.41]               | 10.36 [9.80-10.66]  | 9.84 [9.40-11.55]                | 10.58 [10.16-10.84] | 11.13 [10.31-13.27]              | 10.40 [9.81-10.85]   | 10.65 [9.44-11.54]                |
| TG(18:1/20:1/22:1)        | 986.9093 [M+NH <sub>4</sub> ] <sup>+</sup> | 3.73 [2.76-6.00]    | 3.47 [2.18-4.97]                 | 3.47 [2489-4.20]    | 2.05 [1.63-3.99]                 | 2.61 [1.91-3.21]    | 2.40 [1.95-3.89]                 | 3.29 [2.50-4.13]     | 2.51 [1.83-4.16]                  |
| <b>TG(16:1/16:1/18:2)</b> | 844.7364 [M+NH <sub>4</sub> ] <sup>+</sup> | 180.9 [131.7-274.7] | 186.6 [159.8-284.9]              | 146.3 [132.5-169.4] | 194.2 [147.5-253.9] <sup>a</sup> | 135.0 [127.2-172.5] | 176.5 [155.3-249.6] <sup>a</sup> | 147.3 [130.4-182.8]  | 182.8 [156.9-240.3] <sup>b</sup>  |
| TG(16:1/16:1/17:2)        | 835.6764 [M+Na] <sup>+</sup>               | 3.74 [3.48-4.58]    | 3.34 [3.11-3.82] <sup>f</sup>    | 3.27 [2.83-4.80]    | 3.56 [3.27-3.87]                 | 4.00 [3.15-4.59]    | 3.44 [3.03-4.21]                 | 3.64 [3.20-4.61]     | 3.53 [3.09-3.89]                  |
| <i>TG(16:0/16:0/16:1)</i> | 827.7101 [M+Na] <sup>+</sup>               | 18.79 [13.73-23.10] | 21.13 [19.68-23.71]              | 19.62 [16.30-21.26] | 21.56 [16.07-27.67]              | 18.61 [15.64-20.59] | 22.06 [18.21-33.87]              | 19.01 [15.59-21.21]  | 21.55 [17.11-25.06] <sup>f</sup>  |
| <b>TG(16:1/18:4/18:4)</b> | 862.6902 [M+NH <sub>4</sub> ] <sup>+</sup> | 4.35 [2.95-5.77]    | 6.06 [3.96-9.75]                 | 4.92 [3.46-9.38]    | 6.37 [3.83-7.66]                 | 3.58 [2.70-6.14]    | 7.49 [3.48-11.41] <sup>f</sup>   | 4.35 [2.97-6.41]     | 6.37 [3848-9.41] <sup>a</sup>     |
| TG(16:0/17:2/18:1)        | 860.7679 [M+NH <sub>4</sub> ] <sup>+</sup> | 188.1 [172.9-214.1] | 171.2 [149.0-210.2]              | 162.5 [154.8-245.3] | 189.8 [178.2-201.6]              | 184.9 [164.3-223.6] | 199.7 [181.5-226.2]              | 184.9 [156.0-222.3]  | 190.3 [171.0-220.9]               |
| TG(16:0/16:0/17:2)        | 839.7451 [M+Na] <sup>+</sup>               | 1.69 [1.62-2.09]    | 1.53 [1.34-2.04]                 | 1.44 [1.32-1.60]    | 1.47 [1.13-1.66]                 | 1.48 [1.37-1.66]    | 1.42 [1.31-1.54]                 | 1.575 [1.37-1.71]    | 1.47 [1.32-1.64]                  |
| TG(18:1/18:3/20:0)        | 935.7928 [M+Na] <sup>+</sup>               | 4.06 [3.26-4.93]    | 4.50 [3.68-4.74]                 | 3.75 [3.38-4.50]    | 3.91 [3.15-4.68]                 | 3.88 [3.57-4.26]    | 3.48 [3.07-5.11]                 | 3.76 [3.35-4.49]     | 4.00 [3.24-4.74]                  |
| TG(18:0/18:1/20:3)        | 933.7851[M+Na] <sup>+</sup>                | 21.23 [18.25-26.09] | 22.85 [18.26-23.85]              | 20.20 [17.71-23.06] | 18.26 [17.58-22.54]              | 18.15 [16.42-20.64] | 18.07 [15.91-24.89]              | 19.46 [17.47-22.81]  | 18.90 [17.36-23.78]               |
| <i>TG(18:2/18:2/20:0)</i> | 930.8363 [M+NH <sub>4</sub> ] <sup>+</sup> | 20.55 [18.69-27.42] | 21.32 [14.09-24.77]              | 21.45 [18.33-23.10] | 16.84 [16.19-19.95] <sup>f</sup> | 19.93 [16.96-23.21] | 18.08 [16.22-25.20]              | 21.21 [18.33- 23.40] | 17.47 [15.95-23.86] <sup>f</sup>  |
| <b>TG(18:0/18:1/18:1)</b> | 904.83 [M+NH <sub>4</sub> ] <sup>+</sup>   | 409.5 [354.6-446.6] | 330.4 [236.1-426.1] <sup>t</sup> | 382.1 [283.3-457.9] | 301.6 [266.3-367.9] <sup>f</sup> | 359.5 [312.3-431.2] | 363.3 [337.5- 446.6]             | 387.1 [333.1- 451.4] | 341.6 [267.7- 385.0] <sup>a</sup> |
| <i>TG(18:0/18:1/18:1)</i> | 906.8364 [M+NH <sub>4</sub> ] <sup>+</sup> | 87.79 [75.99-95.81] | 70.76 [46.33-90.71]              | 76.77 [68.56-97.02] | 71.78 [54.56-77.22]              | 79.39 [72.56-94.96] | 78.195 [70.74-102.3]             | 81.24 [74.07-95.84]  | 75.22 [56.50-84.79] <sup>a</sup>  |
| TG(18:1/18:1/18:1)        | 902.8144 [M+NH <sub>4</sub> ] <sup>+</sup> | 943.4 [784.9-1061]  | 855.7 [731.8-1217]               | 971.5 [890.7-1113]  | 843.5 [725.8-946.8] <sup>f</sup> | 923.1 [837.3-1009]  | 956.9 [822.0-1130]               | 956.4 [818.7-1069]   | 8783.3 [810.2-1074]               |
| TG(16:0/18:0/18:1)        | 883.761 [M+Na] <sup>+</sup>                | 42.28 [31.91-44.52] | 42.04 [36.77-43.20]              | 38.88 [23.53-44.34] | 44.50 [42.18-46.51] <sup>a</sup> | 41.08 [38.31-47.87] | 42.75 [40.59-45.54]              | 41.08 [33.90-44.66]  | 42.83 [40.77-45.25]               |
| <b>TG(18:1/18:1/18:2)</b> | 900.7896 [M+NH <sub>4</sub> ] <sup>+</sup> | 244.9 [176.0-281.4] | 202.2 [183.8-243.8]              | 241.7 [229.8-284.9] | 225.9 [165.3-231.2] <sup>b</sup> | 254.7 [229.9-275.3] | 230.2 [201.7-282.0]              | 246.9 [224.0-277.0]  | 225.1 [190.1-236.1] <sup>a</sup>  |
| <i>TG(18:1/18:2/18:2)</i> | 898.7739 [M+NH <sub>4</sub> ] <sup>+</sup> | 99.10 [70.21-133.3] | 85.07 [65.55-118.1]              | 122.9 [108.8-138.1] | 96.31 [34.12-109.6] <sup>a</sup> | 119.1 [94.69-128.3] | 105.7 [74.02-172.9]              | 120.3 [75.92-128.3]  | 96.31 [70.34-119.4] <sup>f</sup>  |
| <b>TG(18:0/18:1/18:2)</b> | 902.8052 [M+NH <sub>4</sub> ] <sup>+</sup> | 264.4 [198.9-286.4] | 246.2 [199.2-308.1]              | 256.6 [249.9-282.9] | 227.0 [186.7-274.2]              | 258.8 [234.5-286.0] | 247.1 [231.79-366.5]             | 260.5 [233.8-281.8]  | 243.6 [211.4-295.7]               |
| <b>TG(16:0/17:1/20:5)</b> | 882.7478 [M+NH <sub>4</sub> ] <sup>+</sup> | 8.58 [8.23-10.15]   | 7.85 [6.33-8.44] <sup>a</sup>    | 8.63 [8.01-9.06]    | 8.18 [7.50-8.88]                 | 9.24 [8.10-10.78]   | 8.71 [8.01-9.10]                 | 8.63 [8.18-9.64]     | 8.31 [7.60-8.83] <sup>a</sup>     |
| TG(18:1/20:1/22:3)        | 982.8773 [M+NH <sub>4</sub> ] <sup>+</sup> | 2.86 [2.58-4.57]    | 3.02 [1.62-4.07]                 | 2.43 [1.97-3.29]    | 1.78 [1.40-2.85] <sup>f</sup>    | 2.04 [1.27-2.60]    | 1.67 [1.31-3.79]                 | 2.52 [1.96-3.30]     | 1.94 [1.43-3.51]                  |
| <i>TG(18:1/18:2/20:0)</i> | 930.8455 [M+NH <sub>4</sub> ] <sup>+</sup> | 80.36 [71.25-106.6] | 83.46 [52.92-93.06]              | 89.02 [72.99-96.08] | 65.85 [59.26-85.19] <sup>f</sup> | 74.82 [64.96-85.56] | 70.14 [58.93-114.1]              | 78.44 [71.25-95.93]  | 71.54 [58.23-93.06] <sup>t</sup>  |
| TG(18:2/20:4/20:4)        | 944.7669 [M+NH <sub>4</sub> ] <sup>+</sup> | 31.12 [28.92-52.66] | 30.18 [22.76-50.38]              | 40.77 [31.42-58.02] | 26.46 [20.25-41.88] <sup>f</sup> | 33.46 [27.79-46.41] | 34.43 [23.77-61.16]              | 39.93 [29.65-52.66]  | 29.27 [22.13-49.46]               |
| TG(18:1/20:4/20:4)        | 946.7742 [M+NH <sub>4</sub> ] <sup>+</sup> | 7.75 [6.97-11.95]   | 6.59 [5.29-10.87]                | 9.21 [7.30-13.61]   | 6.29 [4.29-9.10] <sup>f</sup>    | 7.59 [5.61-10.34]   | 8.32 [5.53-14.07]                | 8.65 [6.97-10.87]    | 6.77 [5.28-11.25]                 |
| TG(20:0/20:0/20:4)        | 989.8484 [M+Na] <sup>+</sup>               | 2.39 [2.25-3.79]    | 2.35 [1.70-3.22]                 | 2.01 [1.68-2.87]    | 1.44 [1.35-2.53] <sup>f</sup>    | 1.97 [1.33-2.40]    | 1.60 [1.40-2.57]                 | 2.27 [1.65-2.85]     | 1.68 [1.41-2.63]                  |
| TG(18:2/20:1/20:1)        | 956.8607 [M+NH <sub>4</sub> ] <sup>+</sup> | 22.47 [16.22-32.91] | 19.87 [12.32-25.20]              | 18.65 [15.11-23.82] | 12.92 [11.51-24.89]              | 15.76 [12.66-22.47] | 12.80 [11.27-26.30]              | 18.75 [14.96-25.95]  | 13.52 [11.70-23.93]               |

|                                                                      |                                                |                      |                               |                     |                                  |                     |                                  |                     |                                   |
|----------------------------------------------------------------------|------------------------------------------------|----------------------|-------------------------------|---------------------|----------------------------------|---------------------|----------------------------------|---------------------|-----------------------------------|
| <i>TG(18:1/20:2/20:4)</i>                                            | 950.814 [M+NH <sub>4</sub> ] <sup>+</sup>      | 90.44 [76.05-107.4]  | 84.07 [54.81-104.6]           | 88.47 [78.42-97.92] | 74.60 [65.14-77.91] <sup>b</sup> | 86.28 [69.70-91.27] | 71.56 [63.89-90.74]              | 88.26 [75.04-95.26] | 74.00 [62.15-90.20] <sup>a</sup>  |
| TG(18:0/20:3/20:5)                                                   | 953.7908 [M+Na] <sup>+</sup>                   | 2.01 [1.67-2.35]     | 2.06 [1.76-2.66]              | 1.87 [1.84-2.43]    | 1.84 [1.76-2.46]                 | 1.86 [1.67-2.23]    | 1.93 [1.77-2.41]                 | 1.89 [1.72-2.32]    | 1.87 [1.77-2.48]                  |
| TG(18:2/20:1/20:4)                                                   | 955.8051 [M+Na] <sup>+</sup>                   | 2.83 [1.85-4.61]     | 2.79 [2.29-4.57]              | 3.00 [2.45-5.30]    | 3.77 [2.07-4.96]                 | 2.79 [2.55-4.39]    | 3.82 [2.88-5.14]                 | 2.89 [2.46-4.61]    | 3.50 [2.50-4.72]                  |
| TG(16:0/18:0/18:0)                                                   | 880.8213 [M+NH <sub>4</sub> ] <sup>+</sup>     | 120.3 [111.0-175.2]  | 92.04 [65.90-186.2]           | 113.7 [95.91-154.8] | 101.2 [78.75-119.6]              | 119.9 [109.0-144.8] | 119.6 [107.7-144.7]              | 119.5 [108.1-154.4] | 110.0 [82.96-128.8] <sup>f</sup>  |
| TG(18:1/20:0/20:0)                                                   | 967.8653 [M+Na] <sup>+</sup>                   | 2.57 [1.30-3.86]     | 2.22 [1.76-3.87]              | 1.59 [1.34-2.50]    | 1.83 [1.46-2.32]                 | 1.57 [1.30-2.39]    | 1.98 [1.68-5.26]                 | 1.69 [1.34-2.62]    | 1.98 [1.67-3.13]                  |
| TG(20:1/20:1/20:4)                                                   | 980.8615 [M+NH <sub>4</sub> ] <sup>+</sup>     | 4.44 [4.06-5.77]     | 4.60 [1.92-5.85]              | 3.64 [2.88-4.25]    | 2.66 [2.49-4.74]                 | 2.69 [2.35-3.33]    | 2.46 [2.06-4.24]                 | 3.64 [2.69-4.41]    | 2.63 [2.16-4.60]                  |
| TG(18:0/20:1/20:4)                                                   | 959.801 [M+NH <sub>4</sub> ] <sup>+</sup>      | 10.77 [9.42-121.2]   | 10.98 [6.89-12.55]            | 8.85 [8.43-10.33]   | 8.59 [7.60-11.07]                | 8.80 [7.99-9.72]    | 7.60 [6.79-10.90]                | 9.16 [8.57-10.72]   | 8.57 [7.13-11.61]                 |
| TG(18:0/20:3/22:0)                                                   | 991.8645 [M+NH <sub>4</sub> ] <sup>+</sup>     | 3.05 [2.37-4.26]     | 3.16 [2.21-3.95]              | 2.61 [1.89-3.29]    | 1.78 [1.42-3.33]                 | 2.51 [1.65-2.70]    | 1.83 [1.66-2.79]                 | 2.61 [1.95-3.24]    | 1.96 [1.69-3.57]                  |
| TG(20:2/20:4/20:4)                                                   | 977.7533 [M+NH <sub>4</sub> ] <sup>+</sup>     | 3.67 [3.18-5.59]     | 2.39 [1.99-5.05]              | 3.74 [2.84-4.48]    | 2.82 [2.17-3.86]                 | 2.89 [1.85-3.72]    | 2.79 [2.26-3.55]                 | 3.58 [2.55-4.31]    | 2.76 [2.17-4.20]                  |
| <b>Sphingomyéline</b>                                                |                                                | 175.42 [120.8-277.0] | 163.5 [150.6-248.9]           | 179.5 [153.0-222.4] | 176.9 [154.6-234.2]              | 145.2 [120.1-221.3] | 201.6 [164.5-271.2] <sup>f</sup> | 178.6 [122.6-220.0] | 188.4 [157.9-245.9]               |
| <b>SM(d18:0/12:0)</b>                                                | 651,5340 [M+H] <sup>+</sup><br>(isotopic peak) | 0.94 [0.63-1.02]     | 1.23 [0.88-1.53] <sup>a</sup> | 0.87 [0.66-1.07]    | 0.94 [0.61-1.44]                 | 0.73 [0.44-0.95]    | 0.85 [0.65-2.24] <sup>f</sup>    | 0.88 [0.52-1.02]    | 1.04 [0.68-1.54] <sup>a</sup>     |
| <b>SM(d18:1/12:0)</b>                                                | 647,5119 [M+H] <sup>+</sup>                    | 4.13 [2.39-6.96]     | 5.52 [4.67-7.43]              | 4.16 [3.16-4.67]    | 5.41 [3.90-6.30]                 | 2.89 [2.62-4.85]    | 5.09 [3.85-8.35] <sup>a</sup>    | 3.80 [2.89-5.56]    | 5.24 [3.99-7.00] <sup>b</sup>     |
| <i>SM(18:1/14:0)</i>                                                 | 675,5425 [M+H] <sup>+</sup>                    | 66.94 [47.08-132.2]  | 79.63 [68.92-118.19]          | 79.70 [45.47-95.18] | 86.57 [64.47-113.50]             | 54.50 [44.54-98.47] | 95.85 [72.43-111.90]             | 72.48 [45.46-98.60] | 86.28 [68.91-111.24] <sup>a</sup> |
| SM(d18:1/16:0)                                                       | 725,5552 [M+Na] <sup>+</sup>                   | 39.03 [34.47-59.04]  | 35.14 [28.62-48.26]           | 43.16 [30.58-54.38] | 37.45 [32.47-46.75]              | 48.34 [31.26-52.30] | 48.64 [37.25-65.23]              | 41.85 [31.37-52.33] | 39.63 [32.05-50.87]               |
| SM(d18:1/16:1)                                                       | 701,5583 [M+H] <sup>+</sup>                    | 16.45[12.04-26.93]   | 16.59 [14.65-25.97]           | 15.03 [10.71-20.52] | 15.61 [12.84-17.54]              | 12.36 [9.55-16.13]  | 14.18 [12.15-17.17]              | 13.98 [10.63-20.40] | 15.97 [12.92-17.79]               |
| SM(d16:1/18:1)                                                       | 723,5399 [M+Na] <sup>+</sup>                   | 3.57 [2.44-4.74]     | 3.34 [2.93-4.45]              | 3.09 [2.34-4.16]    | 2.90 [2.54-3.88]                 | 2.40 [2.10-2.91]    | 2.80 [2.11-3.50]                 | 2.76 [2.15-4.12]    | 2.96 [2.47-3.65]                  |
| <i>SM(18:1/20:1)</i>                                                 | 779,6015 [M+Na] <sup>+</sup>                   | 4.33 [3.30-4.83]     | 3.08 [2.02-4.31] <sup>f</sup> | 3.79 [3.12-4.98]    | 2.74 [2.47-3.57] <sup>a</sup>    | 3.86 [3.29-5.02]    | 3.94 [3.21-5.31]                 | 3.82 [3.20-4.93]    | 3.29 [2.50-4.30] <sup>b</sup>     |
| <b>SM(d18:1/20:2)</b>                                                | 755,5768 [M+H] <sup>+</sup>                    | 1.49 [1.19-2.62]     | 1.05 [0.96-1.65]              | 1.56 [1.28-2.28]    | 1.31 [1.03-1.53] <sup>a</sup>    | 1.20 [0.89-2.00]    | 1.15 [0.91-1.36]                 | 1.49 [1.19-2.17]    | 1.15 [1.01-1.44] <sup>a</sup>     |
| SM(18:1/20:1)                                                        | 757,6205 [M+H] <sup>+</sup>                    | 16.52 [11.36-23.27]  | 14.64 [10.79-19.90]           | 13.83 [11.92-20.75] | 12.95 [11.44-17.21]              | 12.78 [9.99-17.11]  | 15.58 [12.22-20.44]              | 13.82 [11.32-18.54] | 14.51 [12.06-19.27]               |
| <i>SM(d18:1/23:0)</i>                                                | 801.6827 [M+H] <sup>+</sup>                    | 3.72 [3.26-8.83]     | 7.44 [4.37-8.98]              | 6.27 [4.16-7.73]    | 5.86 [5.28-9.18]                 | 6.59 [4.24-7.84]    | 7.78 [6.46-12.33] <sup>f</sup>   | 5.97 [3.64-7.23]    | 7.21 [5.42-9.30] <sup>a</sup>     |
| SM (d18:1/24:0)                                                      | 815.6983 [M+H] <sup>+</sup>                    | 7.25 [5.08-10.21]    | 7.36 [6.00-8.42]              | 8.51 [6.56-11.61]   | 7.81 [5.34-9.80]                 | 6.32 [5.17-10.65]   | 7.31 [6.03-10.19]                | 7.59 [5.81-10.37]   | 7.50 [5.59-9.53]                  |
| <b>Eicosanoids – LeukotrienesProsta glandines &amp; Thromboxanes</b> |                                                |                      |                               |                     |                                  |                     |                                  |                     |                                   |
| <b>10,11-dihydro-20-trihydroxy-leukotriene B4</b>                    | 385.2364 [M-H] <sup>-</sup>                    | 7.87 [5.49-11.22]    | 4.98 [3.94-6.94] <sup>f</sup> | 11.52 [6.06-13.41]  | 6.10 [4.07-7.56] <sup>a</sup>    | 10.41 [6.37-12.44]  | 5.66 [4.24-8.76] <sup>a</sup>    | 9.88 [6.00-12.19]   | 5.66 [4.12-7.09] <sup>c</sup>     |
| 20-Trihydroxy-leukotriene-B4                                         | 383.2208 [M-H] <sup>-</sup>                    | 12.68 [4.86-25.73]   | 9.38 [5.67-15.12]             | 12.29 [5.60-23.86]  | 9.37 [6.77-12.51]                | 10.40 [6.31-15.77]  | 13.85 [7.91-17.96]               | 11.22 [4.99-24.61]  | 9.62 [7.27-15.02]                 |

|                                                 |                             |                     |                     |                                 |                               |                     |                               |                     |                                  |
|-------------------------------------------------|-----------------------------|---------------------|---------------------|---------------------------------|-------------------------------|---------------------|-------------------------------|---------------------|----------------------------------|
| HETE                                            | 319.2278 [M-H] <sup>-</sup> | 2.78 [1.11-4.45]    | 1.71 [0.91-4.65]    | 2.30 [1.08-4.02]                | 2.70 [1.29-5.27]              | 2.17 [0.88-2.48]    | 2.65 [1.62-4.69]              | 2.32 [1.04-3.90]    | 2.31 [1.31-4.47]                 |
| <i>Leukotriene B4</i>                           | 335.2227 [M-H] <sup>-</sup> | 0.53 [0.28-1.40]    | 0.29 [0.21-1.59]    | 0.53 [0.28-0.88]                | 0.38 [0.24-0.77]              | 0.46 [0.18-0.67]    | 0.27 [0.22-0.67]              | 0.51 [0.28-0.94]    | 0.32 [0.22-0.60]                 |
| 7,8-epoxy-17S-HDHA                              | 357.2051 [M-H] <sup>-</sup> | 1.53 [0.80-3.56]    | 1.39 [0.71-2.88]    | 1.85 [0.62-4.91]                | 1.50 [0.90-2.31]              | 1.82 [0.81-2.68]    | 2.25 [0.91-2.53]              | 1.78 [0.80-3.71]    | 1.60 [0.90-2.47]                 |
| <i>15S-HpEDE</i>                                | 339.2537 [M-H] <sup>-</sup> | 1.69 [1.28-3.27]    | 1.47 [1.07-1.89]    | 2.01 [1.31-2.62]                | 1.45 [1.23-1.86]              | 1.56 [1.29-2.15]    | 1.74 [1.30-2.65]              | 1.68 [1.29-2.45]    | 1.50 [1.27-2.00]                 |
| <b>11-deoxy-16,16-dimethyl-PGE2</b>             | 363.252 [M-H] <sup>-</sup>  | 52.22 [32.66-80.30] | 41.16 [26.79-52.95] | 66.77 [31.86-77.46]             | 40.32 [29.54-46.87]           | 49.11 [29.39-65.86] | 40.19 [19.65-50.92]           | 52.64 [32.17-70.29] | 40.19 [25.54-50.40] <sup>a</sup> |
| <b>9-deoxy-9-methylene-16,16-dimethyl -PGE2</b> | 377.2676 [M-H] <sup>-</sup> | 1.77 [0.89-4.70]    | 0.72 [0.65-2.17]    | 1.64 [1.06-3.57]                | 0.99 [0.91-1.28]              | 1.23 [0.59-2.87]    | 1.47 [1.01-3.57]              | 1.38 [0.92-3.30]    | 0.99 [0.72-1.56]                 |
| <b>PGF2alpha</b>                                | 353.2314 [M-H] <sup>-</sup> | 4.66 [3.02-6.98]    | 3.48 [2.16-6.05]    | 5.89 [3.73-8.05]                | 5.50 [3.39-7.36]              | 4.96 [3.06-7.23]    | 4.12 [2.61-7.01]              | 4.89 [3.26-7.50]    | 4.12 [2.76-6.73]                 |
| <b>11-dehydro-2,3-dinor-TXB2</b>                | 339.2001 [M-H] <sup>-</sup> | 1.69 [1.38-4.07]    | 3.25 [2.73-3.85]    | 2.79 [1.68-3.69]                | 2.83 [2.00-5.95]              | 4.01 [2.32-5.23]    | 4.28 [2.53-5.46]              | 2.98 [1.54-4.17]    | 3.29 [2.23-4.75]                 |
|                                                 |                             |                     |                     |                                 |                               |                     |                               |                     |                                  |
| <b>LysoPC/PE</b>                                |                             | 30.35 [28.99-38.13] | 26.60 [16.26-40.47] | 31.12 [21.51-43.99]             | 30.25 [20.64-38.81]           | 31.70[20.61-37.82]  | 29.93 [20.57-53.65]           | 31.55 [25.78-38.13] | 29.07 [20.34-40.91]              |
| LysoPC(16 :0)                                   | 454,2921 [M+H] <sup>+</sup> | 4.24 [3.28-5.02]    | 3.04 [1.61-5.50]    | 3.45 [2.76-4.16]                | 3.35 [1.97-5.16]              | 3.52 [2.76-5.99]    | 3.27 [2.62-4.21]              | 3.76 [2.85-4.60]    | 3.21 [2.42-4.48]                 |
| LysoPC(14:0)                                    | 468,3079 [M+H] <sup>+</sup> | 5.31 [4.20-7.25]    | 5.84 [3.16-1.12]    | 4.40 [3.03-6.99]                | 6.87 [3.96-9.53]              | 3.74 [2.59-5.14]    | 4.61 [3.40-9.63]              | 4.40 [3.16-6.06]    | 5.39 [3.52-9.12]                 |
| <i>LysoPE(16:1)</i>                             | 452,3133 [M+H] <sup>+</sup> | 1.65 [1.31-1.77]    | 1.86 [1.50-2.02]    | 1.46 [0.90-1.65]                | 1.78 [1.40-2.35] <sup>a</sup> | 1.19 [0.86-1.45]    | 1.33 [0.93-1.66]              | 1.37 [1.03-1.66]    | 1.65 [1.25-2.02] <sup>a</sup>    |
| LysoPE(18:1)                                    | 480,3079 [M+H] <sup>+</sup> | 10.81 [9.46-13.07]  | 8.80 [4.18-14.30]   | 13.64 [6.75-11.22] <sub>t</sub> | 11.65 [6.74-15.80]            | 8.83 [5.76-18.53]   | 8.82 [5.25-18.01]             | 11.25 [7.84-16.01]  | 8.82 [6.71-12.77]                |
| LysoPE(20:5)                                    | 500,274 [M+H] <sup>+</sup>  | 2.87 [2.75-3.92]    | 2.19 [1.24-5.08]    | 3.32 [2.48-4.82]                | 2.64 [2.15-3.71]              | 4.17 [2.96-4.70]    | 3.62 [2.85-5.53]              | 3.34 [2.75-4.56]    | 2.94 [2.13-5.07]                 |
| LysoPE(20:3)                                    | 504,3058 [M+H] <sup>+</sup> | 2.76 [2.03-3.41]    | 2.31 [2.19-3.43]    | 2.98 [2.31-3.57]                | 3.00 [2.47-3.57]              | 2.67 [2.23-3.99]    | 4.40 [3.08-5.92] <sup>a</sup> | 2.96 [2.23-3.56]    | 3.09 [2.42-4.50]                 |

|                                |                              |                  |                               |                  |                               |                  |                  |                  |                               |
|--------------------------------|------------------------------|------------------|-------------------------------|------------------|-------------------------------|------------------|------------------|------------------|-------------------------------|
| <i>LysoPE(20:4)</i>            | 502,2902 [M+H] <sup>+</sup>  | 3.21 [2.93-3.59] | 2.56 [1.04-4.28]              | 4.00 [2.29-4.47] | 2.29 [1.41-3.25] <sup>a</sup> | 3.58 [2.11-4.69] | 2.53 [2.08-5.26] | 3.58 [2.49-4.38] | 2.43 [1.74-3.27] <sup>a</sup> |
| <b>LysoPS(22:0)</b>            | 580.3535 [M-H] <sup>-</sup>  | 0.48 [0.38-1.39] | 0.49 [0.17-0.87]              | 0.71 [0.29-1.12] | 0.35 [0.16-0.82]              | 0.42 [0.32-0.87] | 0.64 [0.21-1.40] | 0.51[0.32-1.07]  | 0.43 [0.18-0.86]              |
| <b>LysoPG(22:4)</b>            | 559.2853 [M-H] <sup>-</sup>  | 0.60 [0.48-0.85] | 0.27 [0.14-0.70] <sup>b</sup> | 0.76 [0.54-0.95] | 0.29 [0.15-0.49] <sup>t</sup> | 0.72 [0.38-0.78] | 0.49 [0.21-0.86] | 0.70 [0.49-0.89] | 0.30 [0.20-0.68] <sup>c</sup> |
| <b>LysoPA(20:0)</b>            | 465.3048 [M-H] <sup>-</sup>  | 3.88 [2.57-4.88] | 5.55 [2.85-8.14]              | 4.18 [3.33-5.24] | 4.77 [3.90-8.21]              | 4.31 [3.45-5.97] | 6.49 [3.39-9.16] | 4.19 [3.39-4.93] | 5.75 [3.75-8.59] <sup>a</sup> |
| <b>Cardiolipines</b>           |                              |                  |                               |                  |                               |                  |                  |                  |                               |
| <i>CL(18:1/18:1/20:4/18:0)</i> | 739.5129 [M-2H] <sup>-</sup> | 3.10 [1.47-3.61] | 2.86 [2.48-3.51]              | 2.43 [1.89-3.65] | 2.89 [2.03-3.47]              | 1.82 [1.27-2.84] | 2.65[1.54-2.74]  | 2.40 [1.32-3.57] | 2.74 [2.04-3.22]              |
| CL(18:2/20:0/20:0/20:4)        | 767.5439 [M-2H] <sup>-</sup> | 2.64 [1.55-5.21] | 3.41 [1.47-5.71]              | 3.79 [1.48-5.02] | 2.67 [1.37-4.36]              | 3.14 [1.41-3.55] | 2.71 [2.19-4.73] | 3.21 [1.45-4.41] | 2.87 [1.68-4.54]              |

Values are median and [25% and 75% percentile]. Values of p-values (assessed by Mann Whitney *U* test) between fast and slow growth groups are reported with <sup>a</sup>, <sup>b</sup>, <sup>c</sup> significantly different at same stage of lactation, p<0.05, p<0.01 or p<0.001, respectively and <sup>t</sup>, a trend, 0.050<p<0.10. Lipids in bold and red font presented a corrected p-value <0.05, using the *post hoc* control of the type I error rate (False discovery Rate procedure), between the two infant groups on the total W2 to W4 lactation period.
