# Supplementary figures and images for: Breast Milk Lipidome Is Associated with Early Growth Trajectory in Preterm Infants
Source: Preprints.org preprint supplement (doi:10.20944/preprints201712.0068.v1), 2017-12-11

### MB-PLS-DA score plots

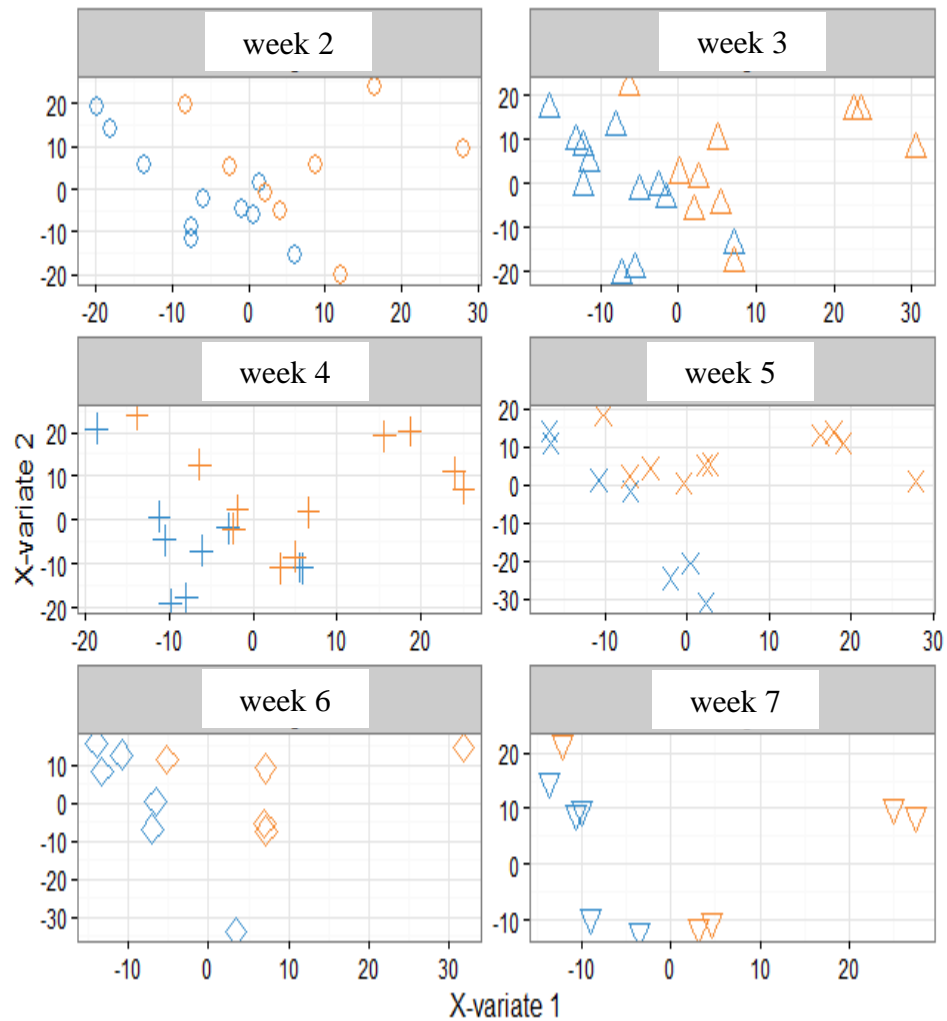

Supplement: Supplementary file 1 [file supplementary › supplemental figure S1-alexandre_Nutrients.pdf]

**Figure S2a**

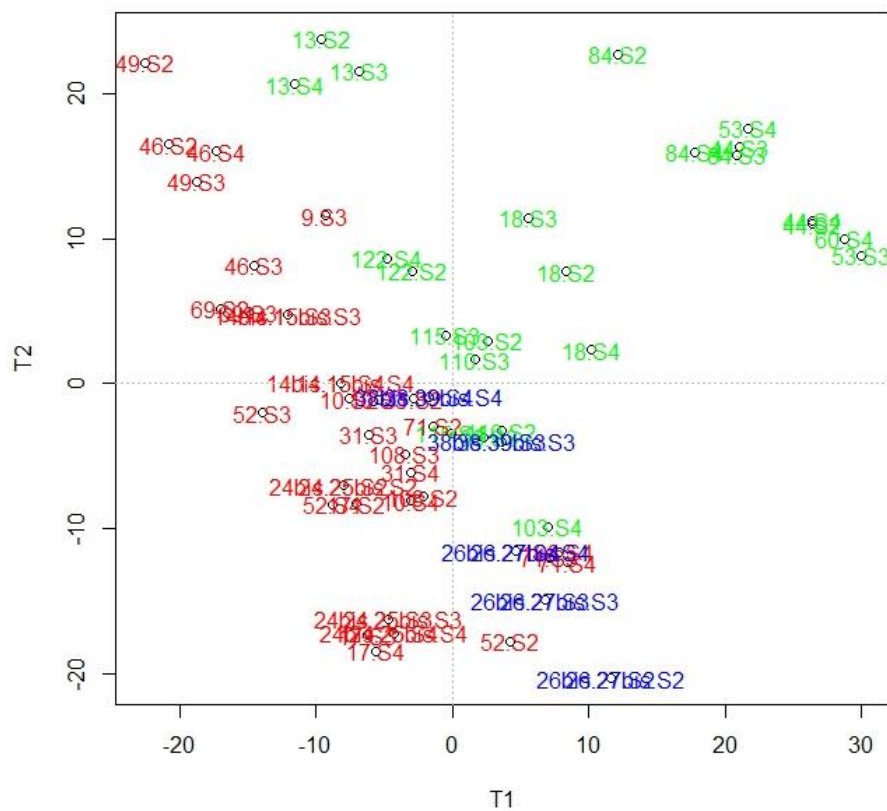

**Figure S2b**

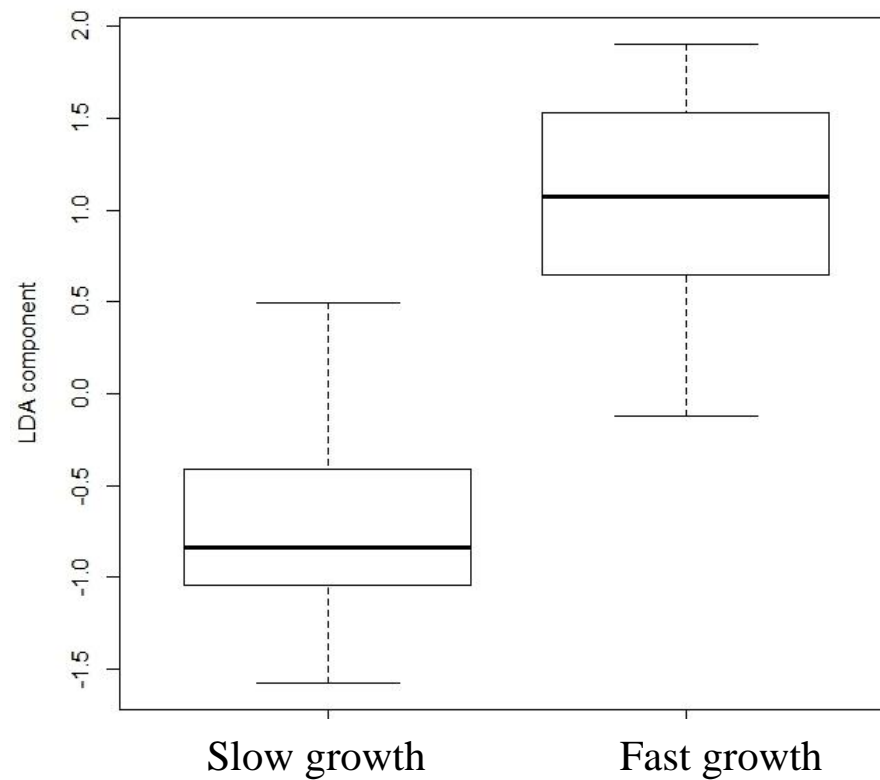

Supplement: Supplementary file 1 [file supplementary › supplemental figure S2-alexandre_Nutrients.pdf]
